# Supplementary material
Source: PubMed Central journal article supplement (PMC2953908)

## S100A8 MS/MS spectrum

| Exp mass                 | %             | Theor mass                                        | Aa res   | Exp mass | % | Thor mass     |
|--------------------------|---------------|---------------------------------------------------|----------|----------|---|---------------|
|                          |               |                                                   | M        |          |   |               |
|                          |               | 10697.62 (y92)                                    | L        |          |   | 245.14 (b2)   |
| 10584.4993<br>10566.4674 | 1.48<br>13.00 | 10584.53 (y91)<br>10566.52 (y91-H <sub>2</sub> O) | <b>T</b> |          |   | 346.18 (b3)   |
|                          |               | 10483.48 (y90)                                    | E        |          |   | 475.22 (b4)   |
|                          |               | 10354.44 (y89)                                    | L        |          |   | 588.31 (b5)   |
|                          |               | 10241.36 (y88)                                    | E        |          |   | 717.35 (b6)   |
|                          |               | 10112.32 (y87)                                    | K        |          |   | 845.44 (b7)   |
|                          |               | 9984.22 (y86)                                     | A        |          |   | 916.48 (b8)   |
|                          |               | 9913.18 (y85)                                     | L        |          |   | 1029.56 (b9)  |
|                          |               | 9800.10 (y84)                                     | N        |          |   | 1143.61 (b10) |
|                          |               | 9686.06 (y83)                                     | S        |          |   | 1230.64 (b11) |
|                          |               | 9599.02 (y82)                                     | I        |          |   | 1343.72 (b12) |
|                          |               | 9485.94 (y81)                                     | I        |          |   | 1456.81(b13)  |
|                          |               | 9372.86 (y80)                                     | D        |          |   | 1571.83 (b14) |
|                          |               | 9257.83 (y79)                                     | V        |          |   | 1670.90 (b15) |
|                          |               | 9158.76 (y78)                                     | Y        |          |   | 1833.97 (b16) |
|                          |               | 8995.70 (y77)                                     | H        |          |   | 1971.03 (b17) |
|                          |               | 8858.64 (y76)                                     | K        |          |   | 2099.12 (b18) |
|                          |               | 8730.54 (y75)                                     | Y        |          |   | 2262.18 (b19) |
|                          |               | 8567.48 (y74)                                     | S        |          |   | 2349.22 (b20) |
|                          |               | 8480.45 (y73)                                     | L        |          |   | 2462.30 (b21) |
|                          |               | 8367.36 (y72)                                     | I        |          |   | 2575.38 (b22) |
|                          |               | 8254.28 (y71)                                     | K        |          |   | 2703.48 (b23) |
|                          |               | 8126.18 (y70)                                     | G        |          |   | 2760.50 (b24) |
|                          |               | 8069.16 (y69)                                     | N        |          |   | 2874.54 (b25) |
|                          |               | 7955.12 (y68)                                     | F        |          |   | 3021.61 (b26) |
|                          |               | 7808.05 (y67)                                     | H        |          |   | 3158.67 (b27) |
|                          |               | 7670.99 (y66)                                     | A        |          |   | 3229.71 (b28) |
|                          |               | 7599.96 (y65)                                     | V        |          |   | 3328.78 (b29) |
|                          |               | 7500.89 (y64)                                     | Y        |          |   | 3491.84 (b30) |
|                          |               | 7337.82 (y63)                                     | R        |          |   | 3647.94 (b31) |
|                          |               | 7181.72 (y62)                                     | D        |          |   | 3762.97 (b32) |
|                          |               | 7066.70 (y61)                                     | D        |          |   | 3877.99 (b33) |
|                          |               | 6951.70 (y60)                                     | L        |          |   | 3991.08 (b34) |
|                          |               | 6838.59 (y59)                                     | K        |          |   | 4119.17 (b35) |
|                          |               | 6710.49 (y58)                                     | K        |          |   | 4247.27 (b36) |
|                          |               | 6582.40 (y57)                                     | L        |          |   | 4360.35 (b37) |
|                          |               | 6469.31 (y56)                                     | L        |          |   | 4473.44 (b38) |
|                          |               | 6356.23 (y55)                                     | E        |          |   | 4602.48 (b39) |
|                          |               | 6227.18 (y54)                                     | T        |          |   | 4703.53 (b40) |
|                          |               | 6126.14 (y53)                                     | E        |          |   | 4832.57 (b41) |
|                          |               | 5997.09 (y52)                                     | C        |          |   | 4935.58 (b42) |
|                          |               | 5894.08 (y51)                                     | P        |          |   | 5032.63 (b43) |
|                          |               | 5797.03 (y50)                                     | Q        |          |   | 5160.69 (b44) |
|                          |               | 5668.97 (y49)                                     | Y        |          |   | 5323.75 (b45) |
|                          |               | 5505.91 (y48)                                     | I        |          |   | 5436.84 (b46) |

|           |        |                                |   |                                     |                         |                                                                                                    |
|-----------|--------|--------------------------------|---|-------------------------------------|-------------------------|----------------------------------------------------------------------------------------------------|
|           |        | 5392.83 (y47)                  | R |                                     |                         | 5592.94 (b47)                                                                                      |
|           |        | 5236.73 (y46)                  | K |                                     |                         | 5721.03 (b48)                                                                                      |
|           |        | 5108.63 (y45)                  | K |                                     |                         | 5849.13 (b49)                                                                                      |
|           |        | 4980.54 (y44)                  | G |                                     |                         | 5906.15 (b50)                                                                                      |
|           |        | 4923.51 (y43)                  | A |                                     |                         | 5977.19 (b51)                                                                                      |
|           |        | 4852.48 (y42)                  | D |                                     |                         | 6092.21 (b52)                                                                                      |
|           |        | 4737.45 (y41)                  | V |                                     |                         | 6191.28 (b53)                                                                                      |
|           |        | 4638.38 (y40)                  | W |                                     |                         | 6377.36 (b54)                                                                                      |
|           |        | 4452.30 (y39)                  | F |                                     |                         | 6524.43 b55                                                                                        |
|           |        | 4305.23 (y38)                  | K |                                     |                         | 6652.53 b56                                                                                        |
|           |        | 4177.14 (y37)                  | E |                                     |                         | 6781.57 b57                                                                                        |
|           |        | 4048.10 (y36)                  | L | 6894.6557<br>6877.5951              | 3.64<br>6.70            | 6894.65 (b58)<br>6877.62 (b58-NH <sub>3</sub> )                                                    |
|           |        | 3935.01 (y35)                  | D | 7009.6714<br>6992.6697              | 3.00<br>8.72            | 7009.68 (b59)<br>6992.65 (b59-NH <sub>3</sub> )                                                    |
|           |        | 3819.99 (y34)                  | I | 7122.7422                           | 12.57                   | 7122.76 (b60)                                                                                      |
|           |        | 3706.90 (y33)                  | N | 7237.7874<br>7208.7820              | 11.36<br>6.61           | 7236.81 (b61)<br>7208.81 (a61)                                                                     |
| 3592.8535 | 4.02   | 3592.86 (y32)                  | T | 7337.7927<br>7319.7926              | 5.57<br>18.14           | 7337.85 (b62)<br>7319.84 (b62-H <sub>2</sub> O)                                                    |
| 3491.8265 | 4.45   | 3491.81 (y31)                  | D | 7452.8700<br>7434.8654              | 7.77<br>3.06            | 7452.88 (b63)<br>7434.87 (b63-H <sub>2</sub> O)                                                    |
| 3376.7745 | 2.59   | 3376.78 (y30)                  | G | 7510.8956<br>7492.8909              | 22.18<br>14.38          | 7509.90 (b64)<br>7492.87 (b64-NH <sub>3</sub> )                                                    |
|           |        | 3319.76 (y29)                  | A | 7581.9328<br>7562.9335<br>7545.9229 | 26.05<br>32.21<br>13.95 | 7580.94 (b65)<br>7562.92 (b65-H <sub>2</sub> O)<br>7545.90 (b65-H <sub>2</sub> O-NH <sub>3</sub> ) |
| 3248.7242 | 44.17  | 3248.72 (y28)                  | V | 7680.0056                           | 3.33                    | 7680.01 (b66)                                                                                      |
| 3231.6967 | 14.03  | 3231.69 (y28-NH <sub>3</sub> ) |   | 7662.9787                           | 3.55                    | 7662.98 (b66-NH <sub>3</sub> )                                                                     |
| 3149.6551 | 100.00 | 3149.66 (y27)                  | N | -----                               |                         | 7794.05 (b67)                                                                                      |
| 3132.6293 | 24.03  | 3132.63 (y27-NH <sub>3</sub> ) |   | 7776.0343                           | 4.54                    | 7776.04 (b67-H <sub>2</sub> O)                                                                     |
| 3035.6103 | 61.36  | 3035.61 (y26)                  | F | 7941.1281                           | 3.01                    | 7941.12 (b68)                                                                                      |
| 2888.5443 | 59.07  | 2888.55 (y25)                  | Q |                                     |                         | 8069.18 (b69)                                                                                      |
| 2871.5310 | 24.02  | 2871.52 (y25-NH <sub>3</sub> ) |   |                                     |                         |                                                                                                    |
| 2760.4855 | 57.17  | 2760.49 (y24-H <sub>2</sub> O) | E |                                     |                         | 8198.22 (b70)                                                                                      |
| 2742.4735 | 14.08  |                                |   |                                     |                         |                                                                                                    |
| 2631.4416 | 31.50  | 2631.44 (y23)                  | F |                                     |                         | 8345.29 (b71)                                                                                      |
|           |        | 2484.38 (y22)                  | L |                                     |                         | 8458.37 (b72)                                                                                      |
| 2371.2917 | 12.03  | 2371.29 (y21)                  | I |                                     |                         | 8571.46 (b73)                                                                                      |
| 2258.2072 | 14.49  | 2258.21 (y20)                  | L |                                     |                         | 8684.54 (b74)                                                                                      |
| 2145.1226 | 7.34   | 2145.12 (y19)                  | V |                                     |                         | 8783.61 (b75)                                                                                      |
| 2046.0525 | 1.81   | 2046.05 (y18)                  | I |                                     |                         | 8896.69 (b76)                                                                                      |
| 1932.9700 | 2.35   | 1932.97 (y17)                  | K |                                     |                         | 9024.79 (b77)                                                                                      |
| 1804.8754 | 6.93   | 1804.88 (y16)                  | M |                                     |                         | 9155.83 (b78)                                                                                      |
|           |        | 1673.84 (y15)                  | G |                                     |                         | 9212.85 (b79)                                                                                      |
|           |        | 1616.81 (y14)                  | V |                                     |                         | 9311.92 (b80)                                                                                      |
|           |        | 1517.75 (y13)                  | A |                                     |                         | 9382.96 (b81)                                                                                      |
|           |        | 1446.71 (y12)                  | A |                                     |                         | 9453.99 (b82)                                                                                      |
|           |        | 1375.67(y11)                   | H |                                     |                         | 9591.05 (b83)                                                                                      |
|           |        | 1238.61(y10)                   | K |                                     |                         | 9719.15 (b84)                                                                                      |
|           |        | 1110.52 (y9)                   | K |                                     |                         | 9847.24 (b85)                                                                                      |

|           |       |             |                                                   |  |  |                |
|-----------|-------|-------------|---------------------------------------------------|--|--|----------------|
|           |       | 982.42 (y8) | S                                                 |  |  | 9934.27 (b86)  |
|           |       | 895.39 (y7) | H                                                 |  |  | 10071.33 (b87) |
|           |       | 758.33 (y6) | E                                                 |  |  | 10200.37 (b88) |
|           |       | 629.29 (y5) | E                                                 |  |  | 10329.42 (b89) |
|           |       | 500.25 (y4) | S                                                 |  |  | 10416.45 (b90) |
|           |       | 413.21 (y3) | H                                                 |  |  | 10553.51 (b91) |
|           |       | 276.18 (y2) | K                                                 |  |  | 10681.60 (b92) |
|           |       | 148.06(y1)  | E                                                 |  |  | -----          |
| 3045.5971 | 16.13 | 3045.58     | <b>KYSLIKGNFHAVYRDDLLKKLLETECP-NH<sub>3</sub></b> |  |  |                |

Lelli\_XT\_00001\_MHp\_#2 RT: 2.00 AV: 1 NL: 3.56E5  
F: FTMS + p ESI d Full ms2 834.44@cid35.00 [215.00-2000.00]

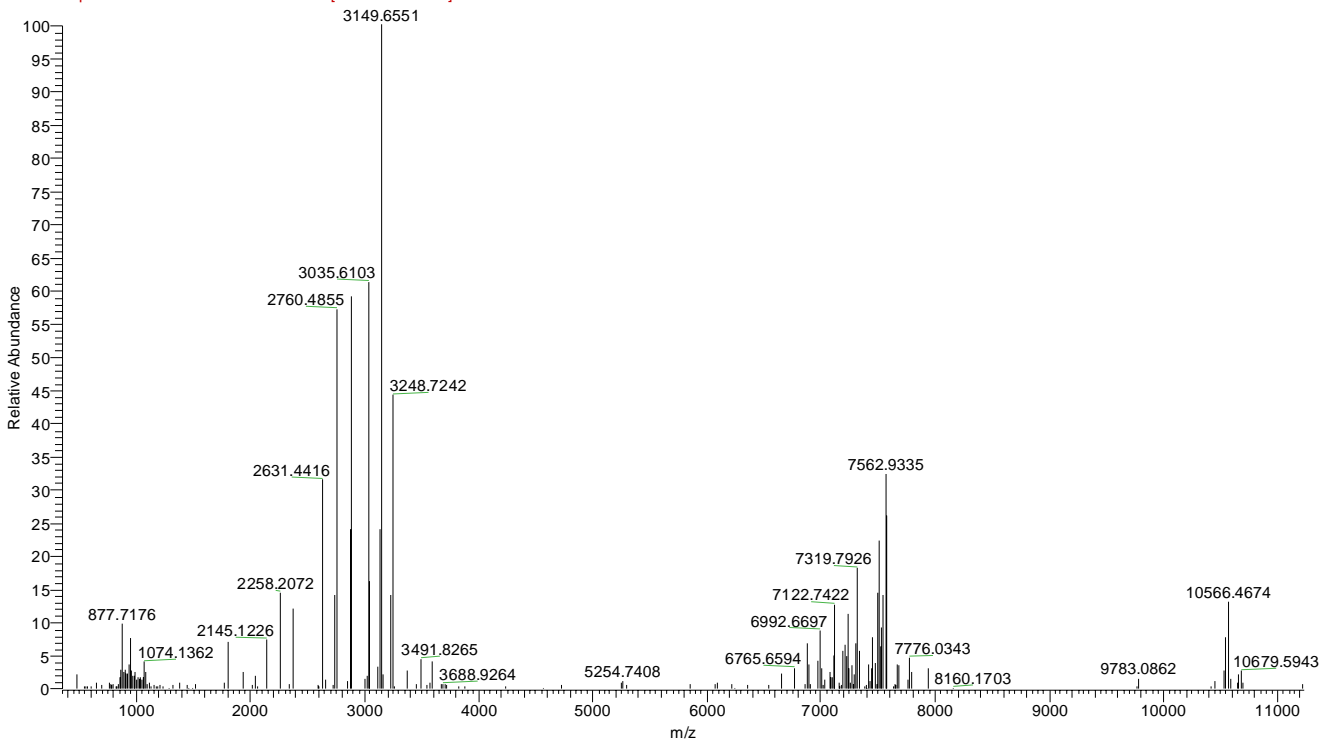

## S100A9\* MS/MS

| Exp mass | %     | Theor mass                                          | Aa res           | Exp mass          | %              | Theor mass                                   |
|----------|-------|-----------------------------------------------------|------------------|-------------------|----------------|----------------------------------------------|
|          |       | 12682.29 (y109)                                     | <b>S(Acetyl)</b> |                   |                |                                              |
|          |       | 12553.25 (y108)                                     | <b>Q</b>         |                   |                | 258.11 (b2)                                  |
| 12407.02 | 13.05 | 12425.19 (y107)<br>12407.18 (y107-H <sub>2</sub> O) | <b>L</b>         |                   |                | 371.19 (b3)                                  |
| 12311.05 |       | 12312.11 (y106)                                     | <b>E</b>         |                   |                | 500.23 (b4)                                  |
| 12181.03 |       | 12183.06 (y105)                                     | <b>R</b>         |                   |                | 656.34 (b5)                                  |
|          |       | 12026.96 (y104)                                     | <b>N</b>         | 770.37891         | 95.83          | 770.38 (b6)                                  |
|          |       | 11912.92 (y103)                                     | <b>I</b>         | 883.4632          | 74.72          | 883.46 (b7)                                  |
| 11799.83 | 9.37  | 11799.84 (y102)                                     | <b>E</b>         | 1012.51<br>995.38 | 58.48<br>20.10 | 1012.51 (b8)<br>995.48 (b8-NH <sub>3</sub> ) |
| 11669.78 | 36.95 | 11670.79 (y101)                                     | <b>T</b>         | 1113.55           | 59.16          | 1113.55 (b9)                                 |
| 11651.75 | 14.81 | 11652.78 (y10-H <sub>2</sub> O)                     |                  | 1095.54           | 94.32          | 1095.54 (b9-H <sub>2</sub> O)                |
| 11569.71 |       | 11569.75 (y100)                                     | <b>I</b>         | 1226.64           | 46.71          | 1226.64 (b10)                                |
| 11456.68 | 45.28 | 11456.66 (y99)                                      | <b>I</b>         |                   |                | 1339.72 (b11)                                |
| 11438.63 | 25.96 | 11438.65 (y99-H <sub>2</sub> O)                     |                  |                   |                |                                              |
| 11325.60 | 17.60 | 11343.58 (y98)<br>11325.57 (y98-H <sub>2</sub> O)   | <b>N</b>         |                   |                | 1453.76 (b12)                                |
| 11229.53 | 10.07 | 11229.54 (y97)                                      | <b>T</b>         |                   |                | 1554.81 (b13)                                |
|          |       | 11128.49 (y96)                                      | <b>F</b>         |                   |                | 1701.88 (b14)                                |
|          |       | 10981.42 (y95)                                      | <b>H</b>         |                   |                | 1838.94 (b15)                                |
|          |       | 10844.36 (y94)                                      | <b>Q</b>         |                   |                | 1967.00 (b16)                                |
|          |       | 10716.30 (y93)                                      | <b>Y</b>         |                   |                | 2130.06 (b17)                                |
|          |       | 10553.24 (y92)                                      | <b>S</b>         |                   |                | 2217.09 (b18)                                |
|          |       | 10466.21 (y91)                                      | <b>V</b>         |                   |                | 2316.16 (b19)                                |
|          |       | 10367.14 (y90)                                      | <b>K</b>         |                   |                | 2444.26 (b20)                                |
|          |       | 10239.04 (y89)                                      | <b>L</b>         |                   |                | 2557.34 (b21)                                |
|          |       | 10125.96 (y88)                                      | <b>G</b>         |                   |                | 2614.36 (b22)                                |
|          |       | 10068.94 (y87)                                      | <b>H</b>         | 2751.42           | 96.57          | 2751.42 (b23)                                |
|          |       | 9931.88 (y86)                                       | <b>P</b>         |                   |                | 2848.47 (b24)                                |
|          |       | 9834.83 (y85)                                       | <b>D</b>         |                   |                | 2963.50 (b25)                                |
|          |       | 9719.78 (y84)                                       | <b>T</b>         |                   |                | 3064.55 (b26)                                |
|          |       | 9618.75 (y83)                                       | <b>L</b>         |                   |                | 3177.63 (b27)                                |
| 9505.65  | 4.77  | 9505.67 (y82)                                       | <b>N</b>         |                   |                | 3291.68 (b28)                                |
|          |       | 9391.62 (y81)                                       | <b>Q</b>         |                   |                | 3419.73 (b29)                                |
|          |       | 9263.57 (y80)                                       | <b>G</b>         |                   |                | 3476.76 (b30)                                |
|          |       | 9206.55 (y79)                                       | <b>E</b>         |                   |                | 3605.80 (b31)                                |
|          |       | 9077.50 (y78)                                       | <b>F</b>         |                   |                | 3752.87 (b32)                                |
|          |       | 8930.43 (y77)                                       | <b>K</b>         |                   |                | 3880.96 (b33)                                |
|          |       | 8802.34 (y76)                                       | <b>E</b>         |                   |                | 4010.00 (b34)                                |
|          |       | 8673.30 (y75)                                       | <b>L</b>         |                   |                | 4123.09 (b35)                                |
|          |       | 8560.21 (y74)                                       | <b>V</b>         |                   |                | 4222.16 (b36)                                |
|          |       | 8461.14 (y73)                                       | <b>R</b>         |                   |                | 4378.26 (b37)                                |
|          |       | 8305.04 (y72)                                       | <b>K</b>         |                   |                | 4506.35 (b38)                                |
|          |       | 8176.95 (y71)                                       | <b>D</b>         |                   |                | 4621.38 (b39)                                |
|          |       | 8061.92 (y70)                                       | <b>L</b>         |                   |                | 4734.46 (b40)                                |
|          |       | 7948.84 (y69)                                       | <b>Q</b>         |                   |                | 4862.52 (b41)                                |
|          |       | 7820.78 (y68)                                       | <b>N</b>         |                   |                | 4976.56 (b42)                                |
|          |       | 7706.74 (y67)                                       | <b>F</b>         |                   |                | 5123.63 (b43)                                |
|          |       | 7559.67 (y66)                                       | <b>L</b>         |                   |                | 5236.72 (b44)                                |
|          |       | 7446.58 (y65)                                       | <b>K</b>         |                   |                | 5364.81 (b45)                                |
|          |       | 7318.49 (y64)                                       | <b>K</b>         |                   |                | 5492.91 (b46)                                |
|          |       | 7190.39 (y63)                                       | <b>E</b>         |                   |                | 5621.95 (b47)                                |
|          |       | 7061.35 (y62)                                       | <b>N</b>         |                   |                | 5735.99 (b48)                                |
|          |       | 6947.31 (y61)                                       | <b>K</b>         |                   |                | 5864.09 (b49)                                |
|          |       | 6819.21 (y60)                                       | <b>N</b>         |                   |                | 5978.13 (b50)                                |

|          |       |                                 |          |          |       |                                 |
|----------|-------|---------------------------------|----------|----------|-------|---------------------------------|
|          |       | 6705.17 (y59)                   | <b>E</b> |          |       | 6107.17 (b51)                   |
|          |       | 6576.13 (y58)                   | <b>K</b> |          |       | 6235.27 (b52)                   |
|          |       | 6448.03 (y57)                   | <b>V</b> |          |       | 6334.34 (b53)                   |
|          |       | 6348.96 (y56)                   | <b>I</b> |          |       | 6447.42 (b54)                   |
|          |       | 6235.88 (y55)                   | <b>E</b> |          |       | 6576.46 (b55)                   |
|          |       | 6106.84 (y54)                   | <b>H</b> | 6713.50  | 16.59 | 6713.52 (b56)                   |
|          |       | 5969.78 (y53)                   | <b>I</b> |          |       | 6826.61 (b57)                   |
| 5856.70  | 26.74 | 5856.69 (y52)                   | <b>M</b> |          |       | 6957.65 (b58)                   |
| 5724.63  | 14.68 | 5725.65 (y51)                   | <b>E</b> |          |       | 7086.69 (b59)                   |
| 5709.65  | 4.53  | 5708.63 (y51-NH <sub>3</sub> )  |          |          |       |                                 |
|          |       | 5596.61 (y50)                   | <b>D</b> |          |       | 7201.72 (b60)                   |
|          |       | 5481.58 (y49)                   | <b>L</b> |          |       | 7314.81 (b61)                   |
|          |       | 5368.50 (y48)                   | <b>D</b> | 7429.83  | 9.71  | 7429.83 (b62)                   |
| 5253.54  | 3.40  | 5253.47 (y47)                   | <b>T</b> | 7530.85  | 4.75  | 7530.87 (b63)                   |
|          |       | 5152.42 (y46)                   | <b>N</b> | 7643.92  | 9.05  | 7644.92 (b64)                   |
|          |       | 5038.38 (y45)                   | <b>A</b> | 7715.95  | 8.53  | 7715.95 (b65)                   |
|          |       | 4967.34 (y44)                   | <b>D</b> | 7830.96  | 36.73 | 7830.98 (b66)                   |
|          |       |                                 |          | 7813.87  | 13.08 | 7812.97 (b66-H <sub>2</sub> O)  |
| 4852.31  |       | 4852.32 (y43)                   | <b>K</b> |          |       | 7959.08 (b67)                   |
|          |       | 4724.22 (y42)                   | <b>Q</b> |          |       | 8087.14 (b68)                   |
| 4707.20  | 6.19  | 4707.20 (y42- NH <sub>3</sub> ) |          |          |       |                                 |
| 4596.17  | 8.43  | 4596.17 (y41)                   | <b>L</b> |          |       | 8200.22 (b69)                   |
| 4483.09  | 19.62 | 4483.08 (y40)                   | <b>S</b> |          |       | 8287.25 (b70)                   |
|          |       | 4396.05 (y39)                   | <b>F</b> |          |       | 8434.32 (b71)                   |
|          |       | 4248.98 (y38)                   | <b>E</b> |          |       | 8563.36 (b72)                   |
| 4120.96  |       | 4119.94 (y37)                   | <b>E</b> | 8692.40  | 43.14 | 8692.41 (b73)                   |
|          |       | 3990.89 (y36)                   | <b>F</b> |          |       | 8839.47 (b74)                   |
| 3843.82  | 2..72 | 3843.83 (y35)                   | <b>I</b> |          |       | 8952.56 (b75)                   |
| 3825.84  | 15.22 | 3826.80 (y35-H <sub>2</sub> O)  |          |          |       |                                 |
| 3730.75  | 96.16 | 3730.74 (y34)                   | <b>M</b> |          |       | 9083.60 (b76)                   |
| 3599.68  | 27.84 | 3599.70 (y33)                   | <b>L</b> |          |       | 9196.68 (b77)                   |
| 3485.64  | 16.42 | 3486.62 (y32)                   | <b>M</b> |          |       | 9327.72 (b78)                   |
|          |       | 3355.58 (y31)                   | <b>A</b> |          |       | 9398.76 (b79)                   |
|          |       | 3284.54 (y30)                   | <b>R</b> |          |       | 9554.86 (b80)                   |
|          |       | 3128.44 (y29)                   | <b>L</b> |          |       | 9667.94 (b81)                   |
|          |       | 3015.35 (y28)                   | <b>T</b> |          |       | 9768.99 (b82)                   |
|          |       | 2914.31 (y27)                   | <b>W</b> |          |       | 9955.07 (b83)                   |
|          |       | 2728.23 (y26)                   | <b>A</b> |          |       | 10026.11 (b84)                  |
|          |       | 2657.19 (y25)                   | <b>S</b> |          |       | 10113.14 (b85)                  |
|          |       | 2570.16 (y24)                   | <b>H</b> |          |       | 10250.20 (b86)                  |
|          |       | 2433.10 (y23)                   | <b>E</b> |          |       | 10379.24 (b87)                  |
|          |       | 2304.06 (22)                    | <b>K</b> |          |       | 10507.34 (b88)                  |
|          |       | 2175.96 (y21)                   | <b>M</b> |          |       | 10638.38 (b89)                  |
|          |       | 2044.92 (y20)                   | <b>H</b> | 10775.44 | 14.28 | 10775.44 (b90)                  |
|          |       | 1907.86 (y19)                   | <b>E</b> |          |       | 10904.48 (b91)                  |
| 1778.82  | 10.29 | 1778.82 (y18)                   | <b>G</b> |          |       | 10961.50 (b92)                  |
|          |       | 1721.80 (y17)                   | <b>D</b> |          |       | 11076.53 (b93)                  |
| 1606.77  | 14.17 | 1606.77 (y16)                   | <b>E</b> |          |       | 11205.57 (b94)                  |
| 1588.76  | 14.47 | 1588.76 (y16-H <sub>2</sub> O)  |          |          |       |                                 |
| 1477.73  | 19.44 | 1477.73 (y15)                   | <b>G</b> |          |       | 11262.59 (b95)                  |
|          |       | 1420.71 (y14)                   | <b>P</b> | 11341.46 | 38.67 | 11359.64 (b96)                  |
|          |       |                                 |          |          |       | 11341.63 (b96-H <sub>2</sub> O) |
|          |       | 1323.65 (y13)                   | <b>G</b> |          |       | 11416.67 (b97)                  |
|          |       | 1266.63 (y12)                   | <b>H</b> | 11554.62 | 19.91 | 11553.73 (b98)                  |
| 1129.57  | 10.04 | 1129.57 (y11)                   | <b>H</b> |          |       | 11690.78 (b99)                  |
|          |       | 992.52 (y10)                    | <b>H</b> |          |       | 11827.84 (b100)                 |
| 855.4555 | 12.86 | 855.46 (y9)                     | <b>K</b> |          |       | 11955.94 (b101)                 |
| 727.3617 | 33.56 | 727.36 (y8)                     | <b>P</b> |          |       | 12052.99 (b102)                 |
|          |       | 630.31 (y7)                     | <b>G</b> |          |       | 12110.01 (b103)                 |

|  |             |          |          |        |                                  |
|--|-------------|----------|----------|--------|----------------------------------|
|  | 573.29 (y6) | <b>L</b> |          |        | 12223.10 (b104)                  |
|  | 460.20 (y5) | <b>G</b> |          |        | 12280.12 (b105)                  |
|  | 403.18 (y4) | <b>E</b> |          |        | 12409.17 (b106)                  |
|  | 274.14 (y3) | <b>G</b> |          |        | 12466.18 (b107)                  |
|  | 217.12 (y2) | <b>T</b> | 12567.22 | 100.00 | 12567.23 (b108)                  |
|  |             |          | 12549.25 | 56.83  | 12549.22 (b108-H <sub>2</sub> O) |
|  | 116.07 (y1) | <b>P</b> |          |        | ---                              |

Lelli\_XT\_00001\_MHp\_100128094433 #2 RT: 2.00 AV: 1 NL: 2.07E4  
 F: FTMS + p ESI d Full ms2 977.02@cid35.00 [255.00-2000.00]

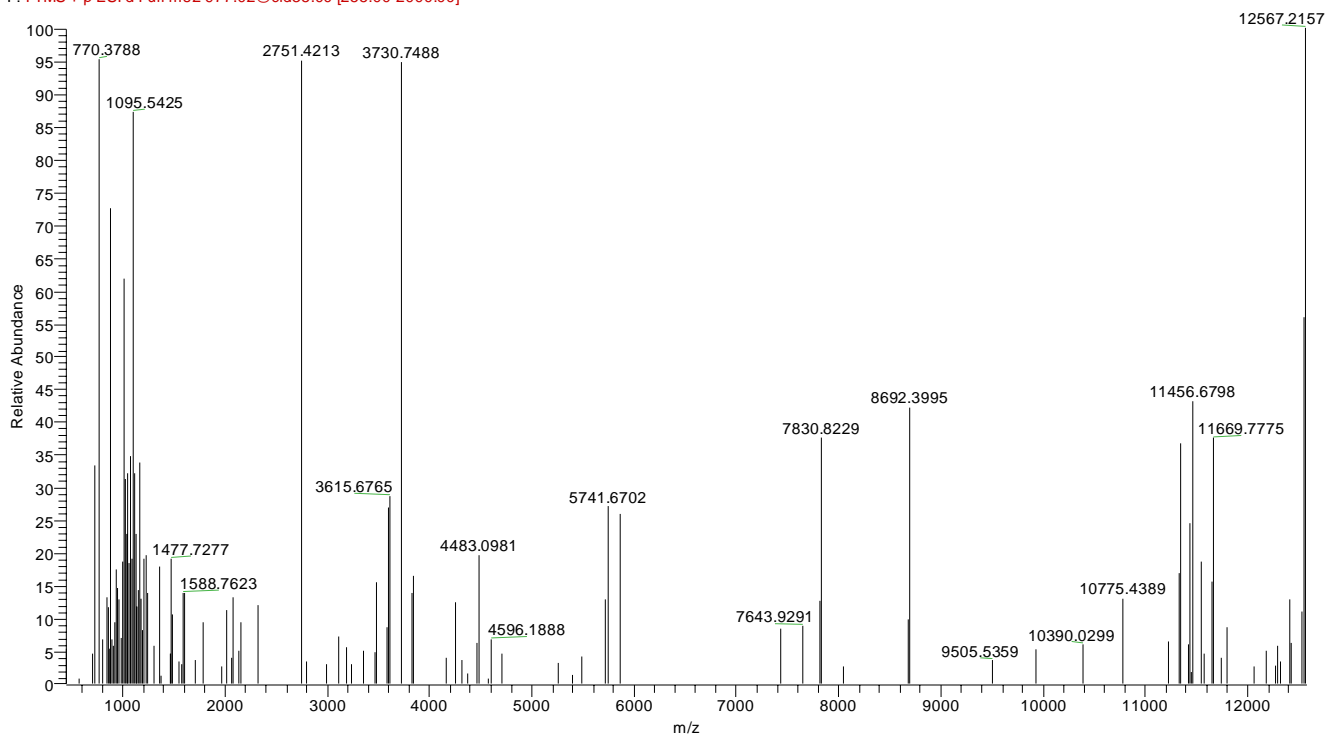

Supplement: supp_M110.001057_mcp.M110.001057-1.pdf [file supp_M110.001057_mcp.M110.001057-1.pdf]
