# Supplementary material
Source: PubMed Central journal article supplement (PMC2953908)

F: FTMS + p NSI sid=15.00 d Full ms2 736.36@cid35.00 [190.00-1485.00]

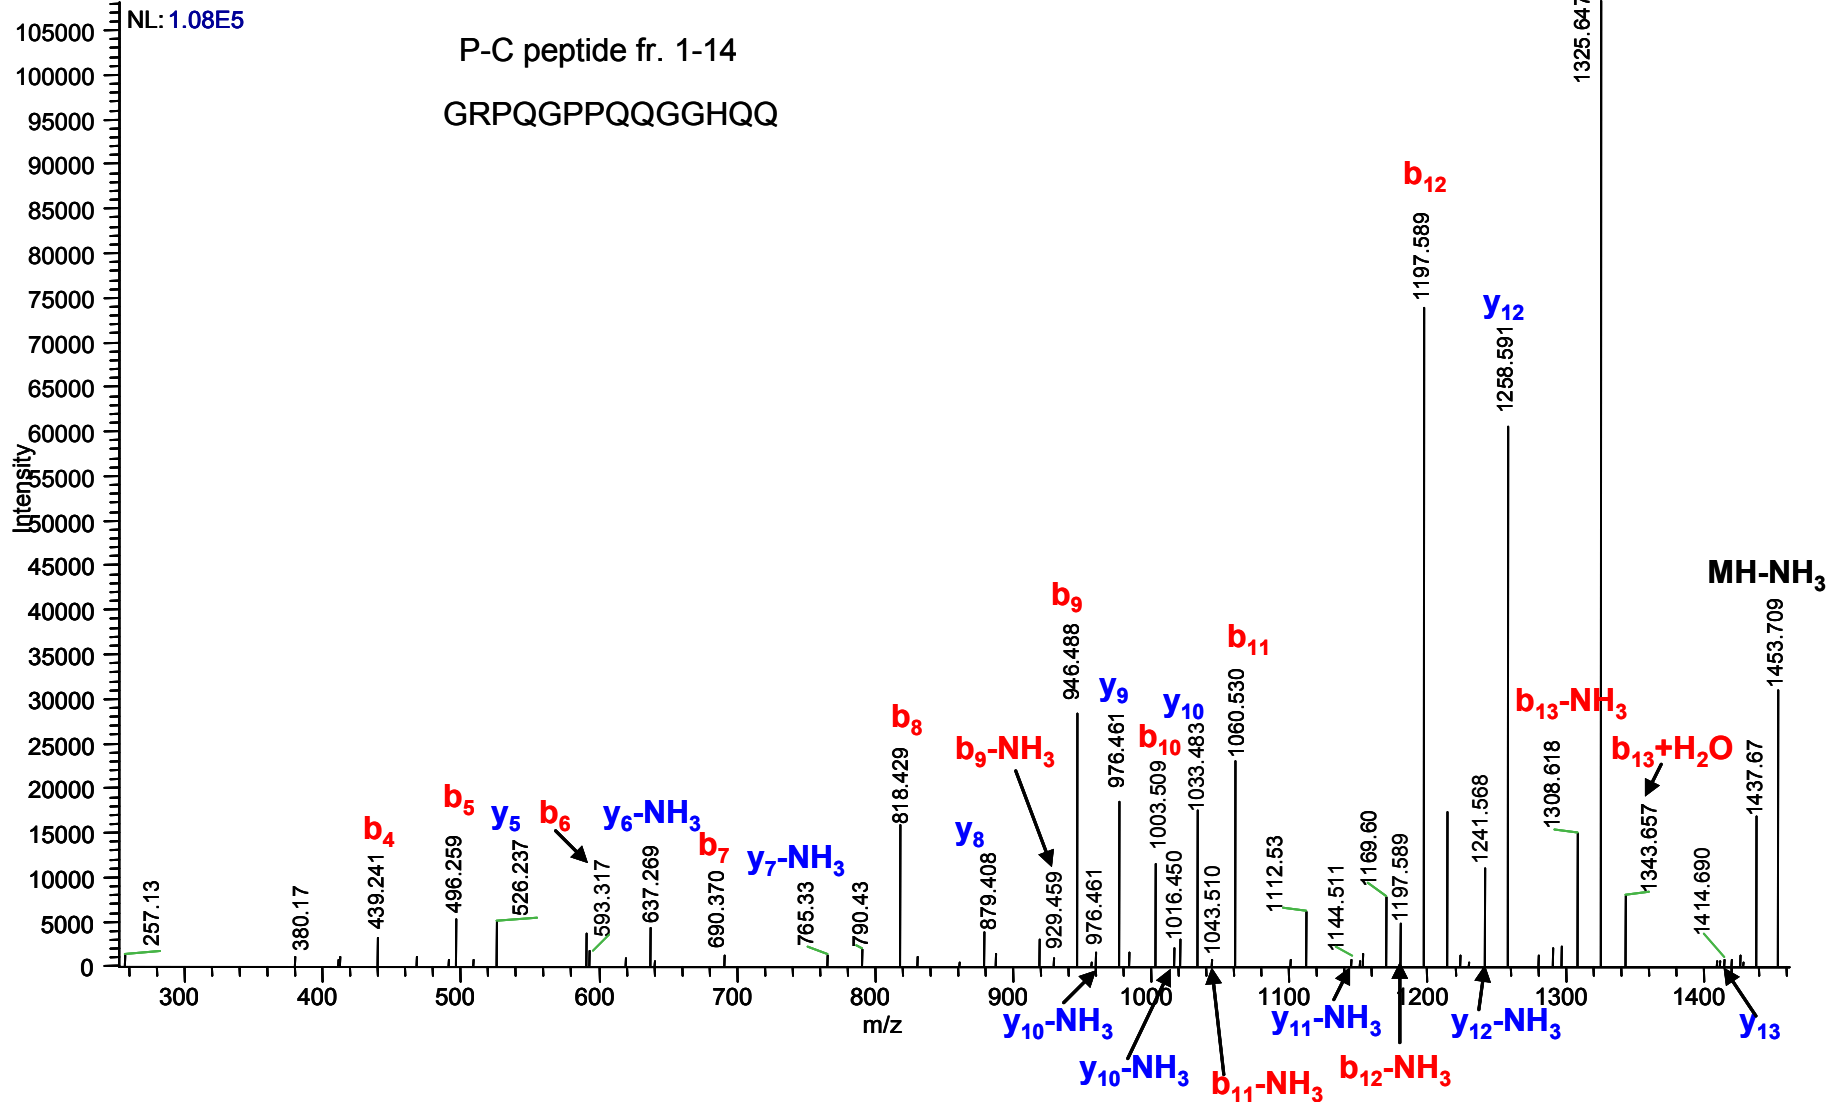

F: FTMS + p NSI sid=15.00 d Full ms2 841.43@cid35.00 [220.00-2000.00]

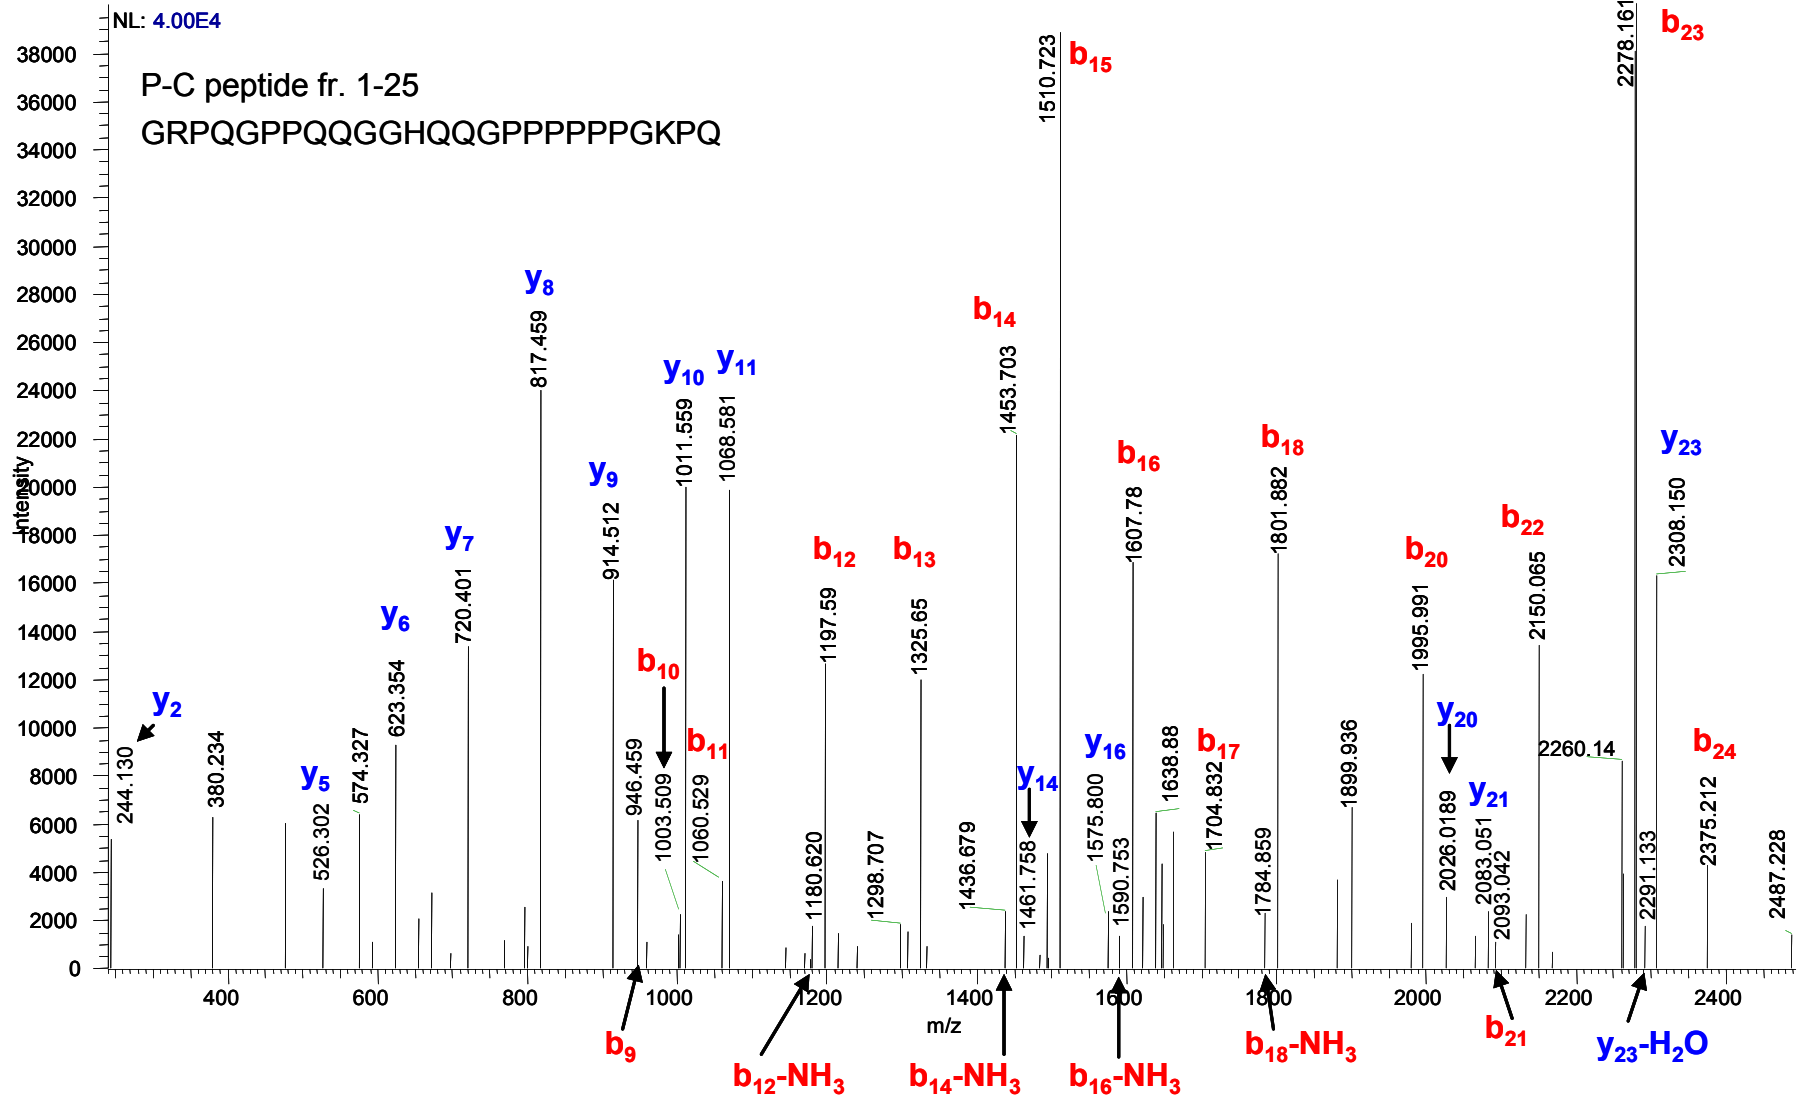

F: FTMS+ p NSI sid=15.00 dFull ms2 695.43@cid35.00 [210.00-2200.00]

NL:6.34E3

P-C peptide fr. 5-25  
GPPQQGGHQQGPPPPPGKPQ

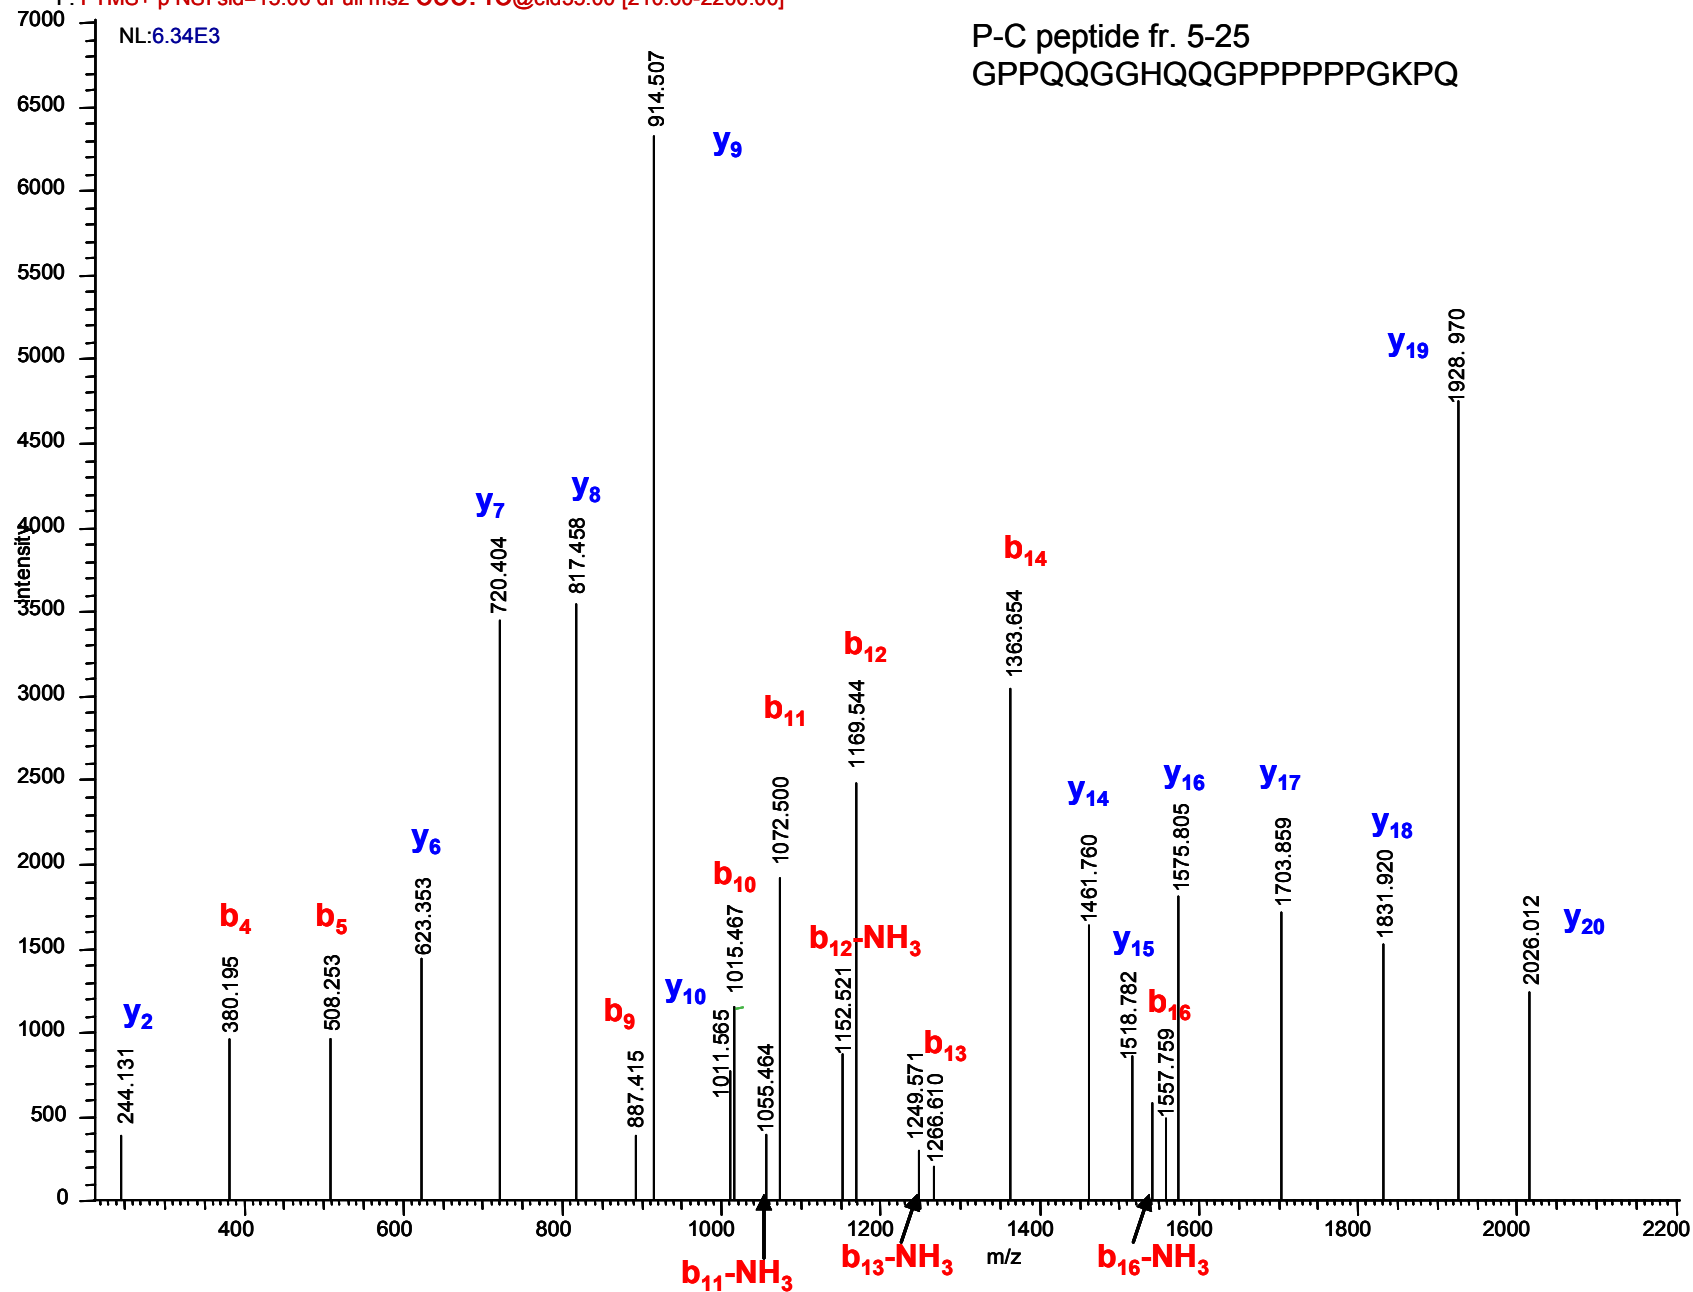

Supplement: supp_M110.001057_mcp.M110.001057-4.pdf [file supp_M110.001057_mcp.M110.001057-4.pdf]
