# Supplementary material
Source: PubMed Central journal article supplement (PMC2953908)

F: FTMS + p NSI sid=15.00 d Full ms2 973.12@cid35.00 [255.00-2000.00]

NL: 3.00E5

P-C peptide fr.15-44

GPPPPPPGKPKQGPPPQGGRPQGPPQGQSPQ

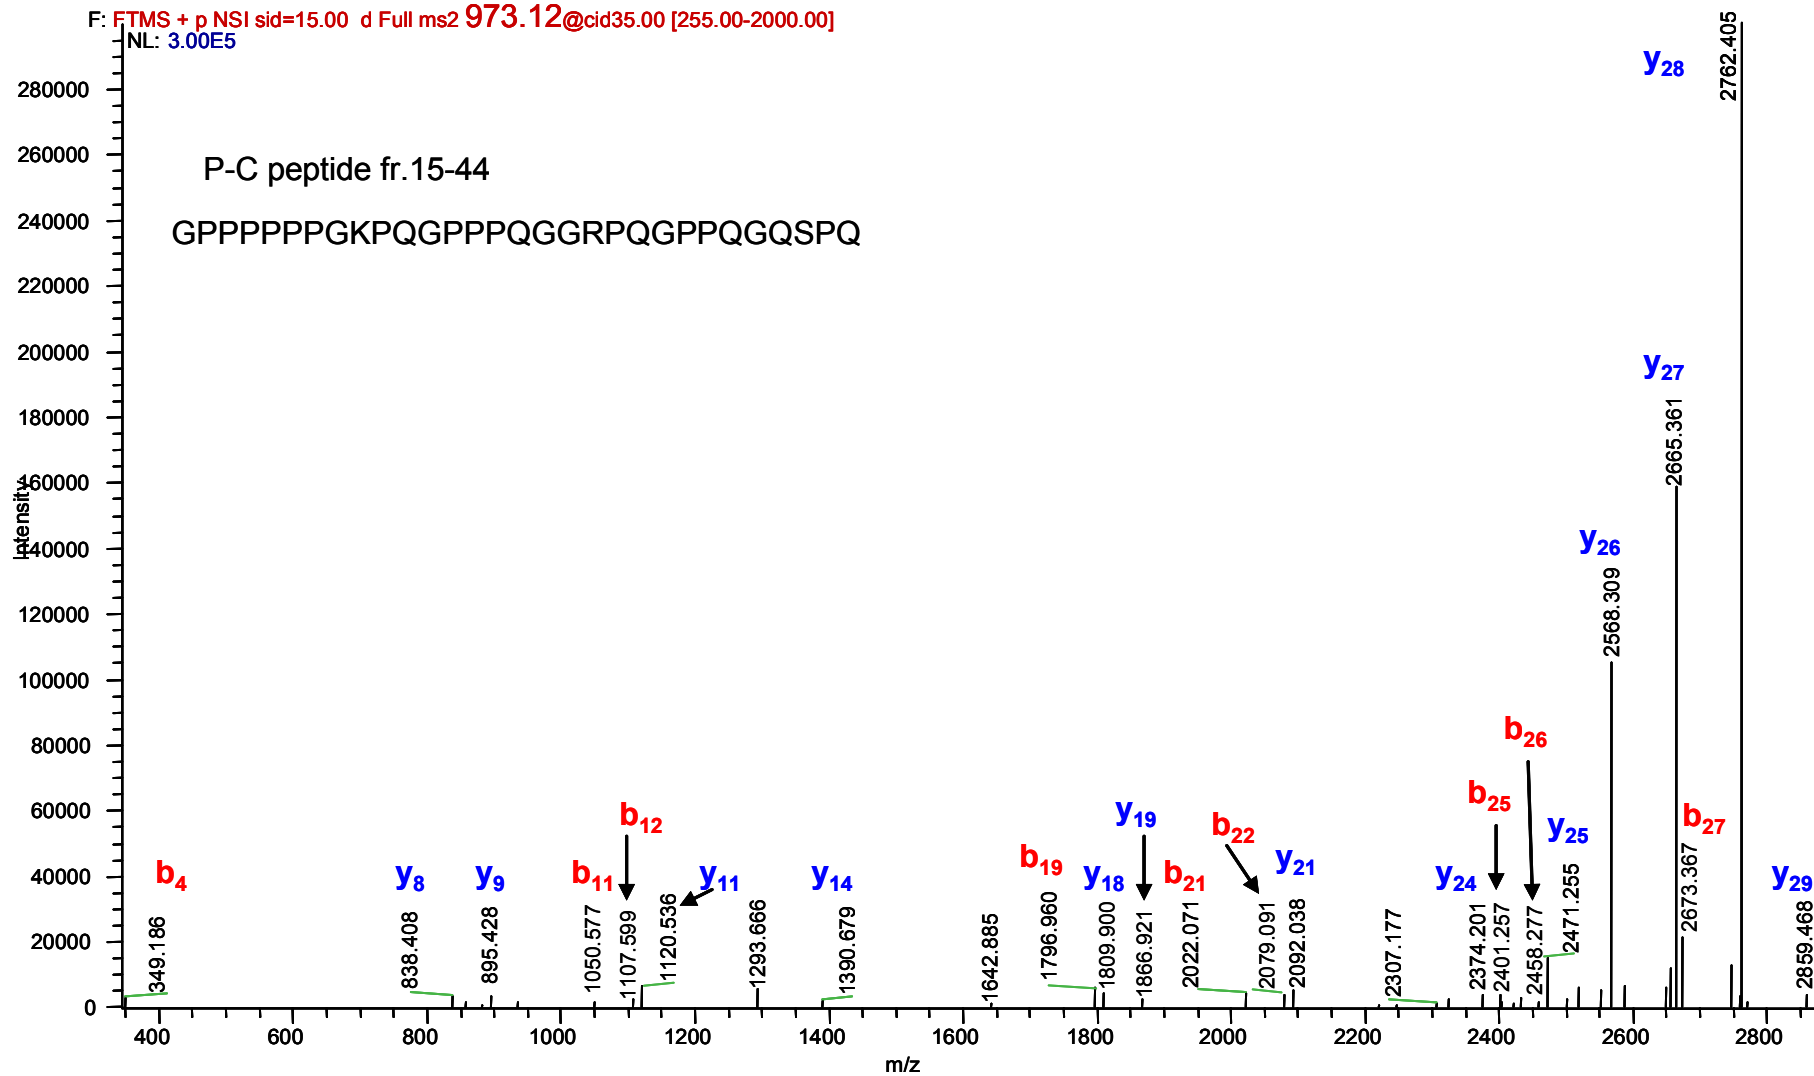

F: FTMS+ p NSI sid=15.00 dFull ms2 894.90@cid35.00 [245.00-900.00]

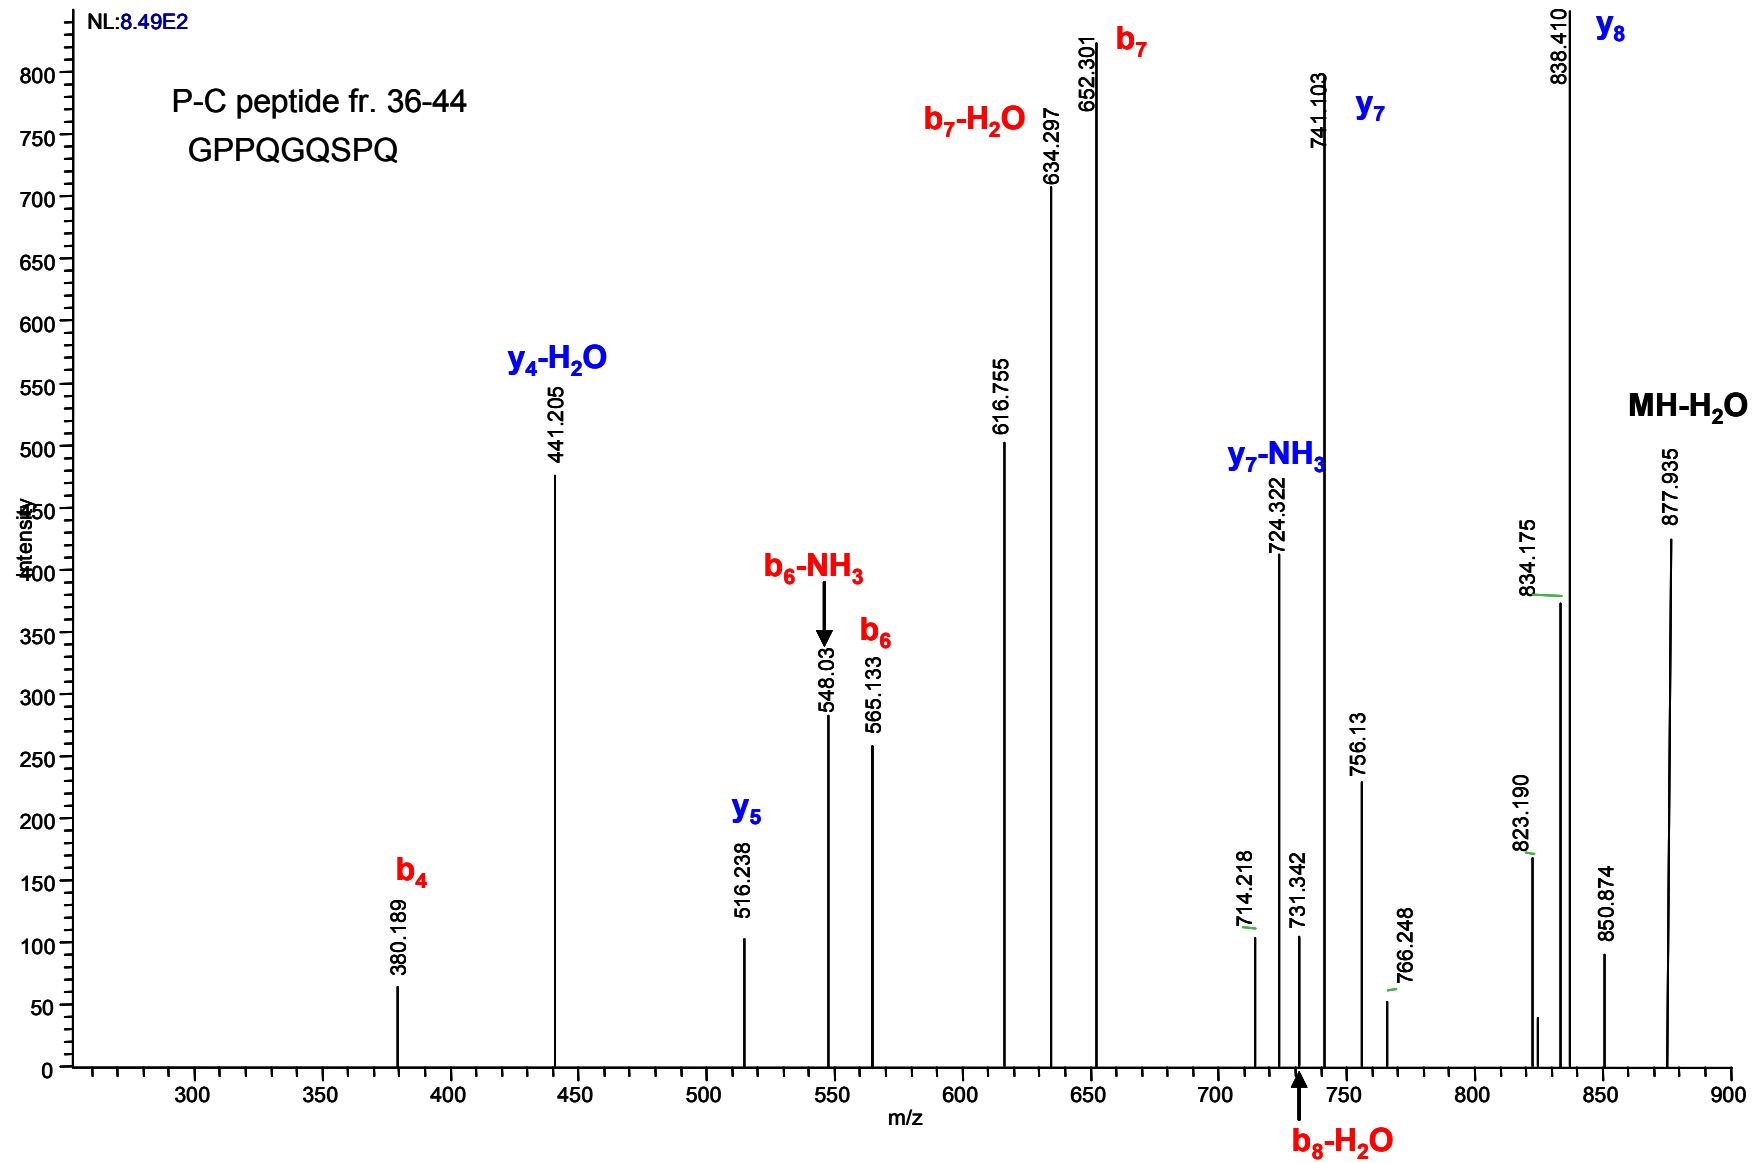

F: FTMS + p NSI sid=15.00 d Full ms2 934.47@cid35.00 [245.00-1880.00]

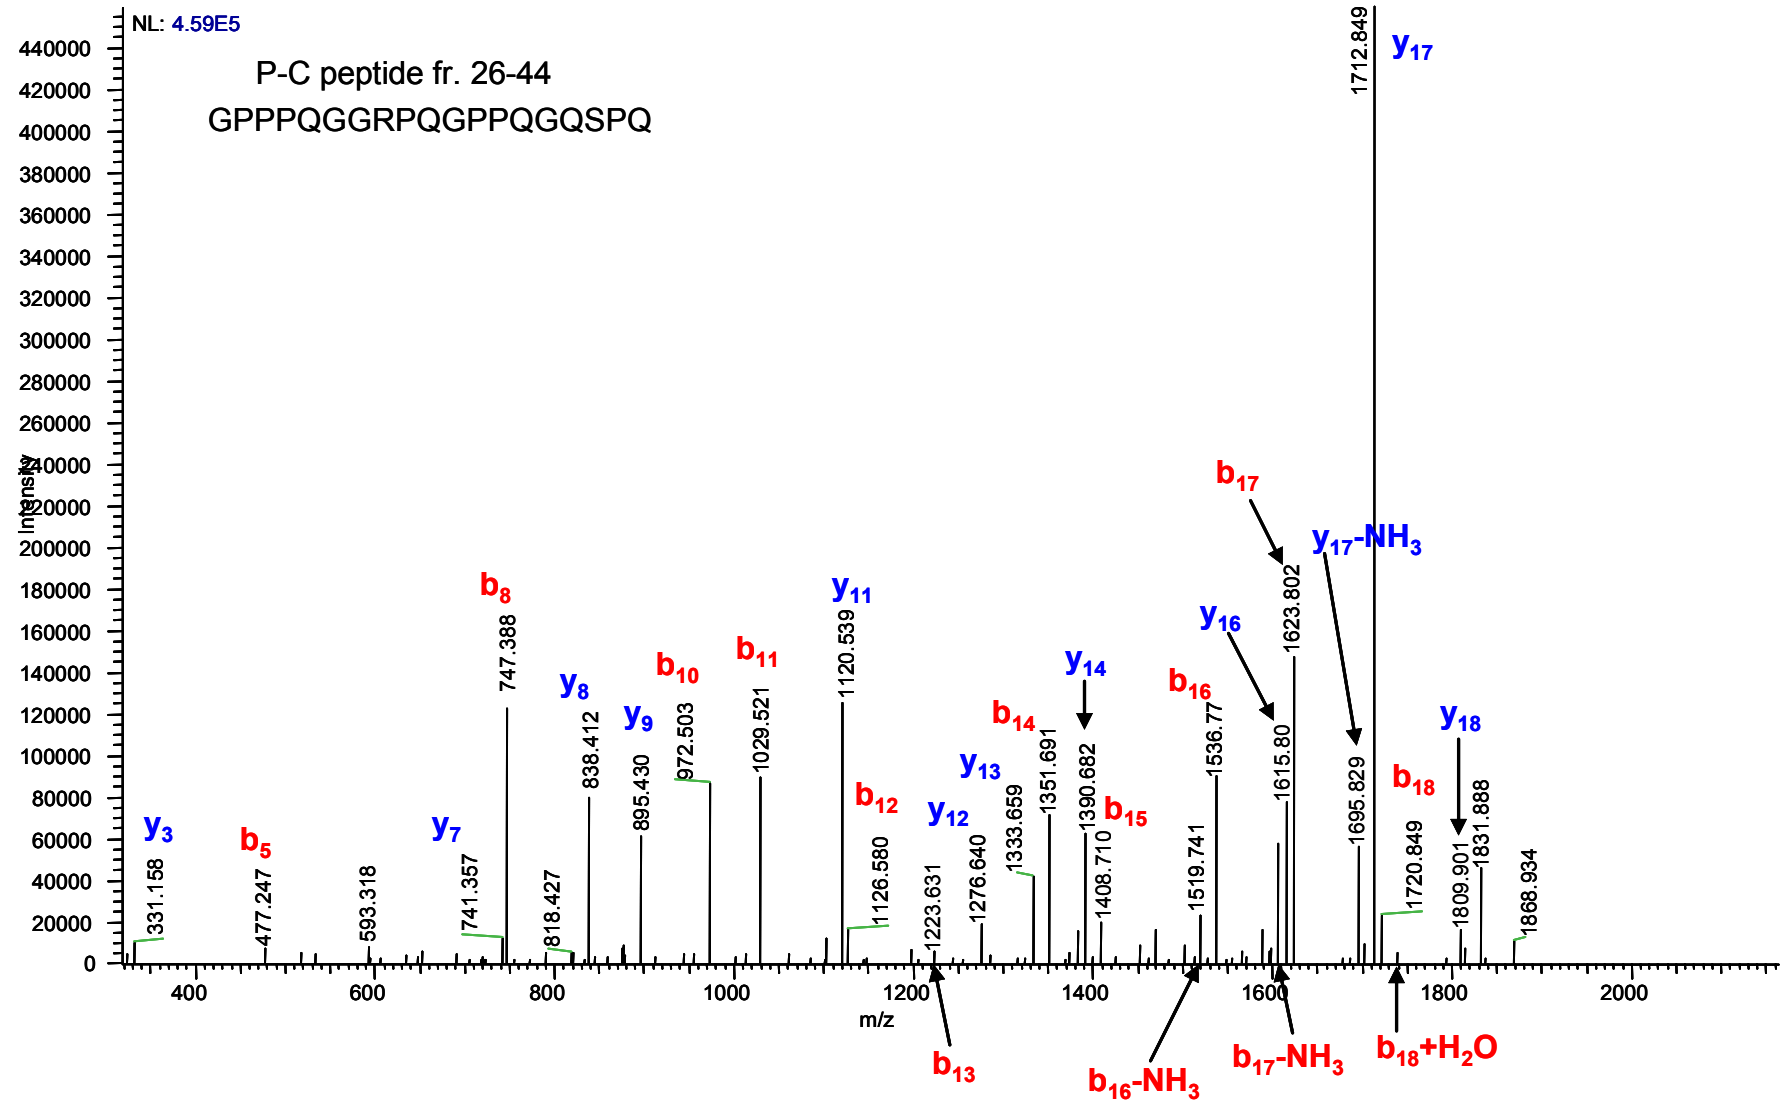

F: FTMS + p NSI sid=15.00 d Full ms2 495.76@cid35.00 [125.00-1005.00]

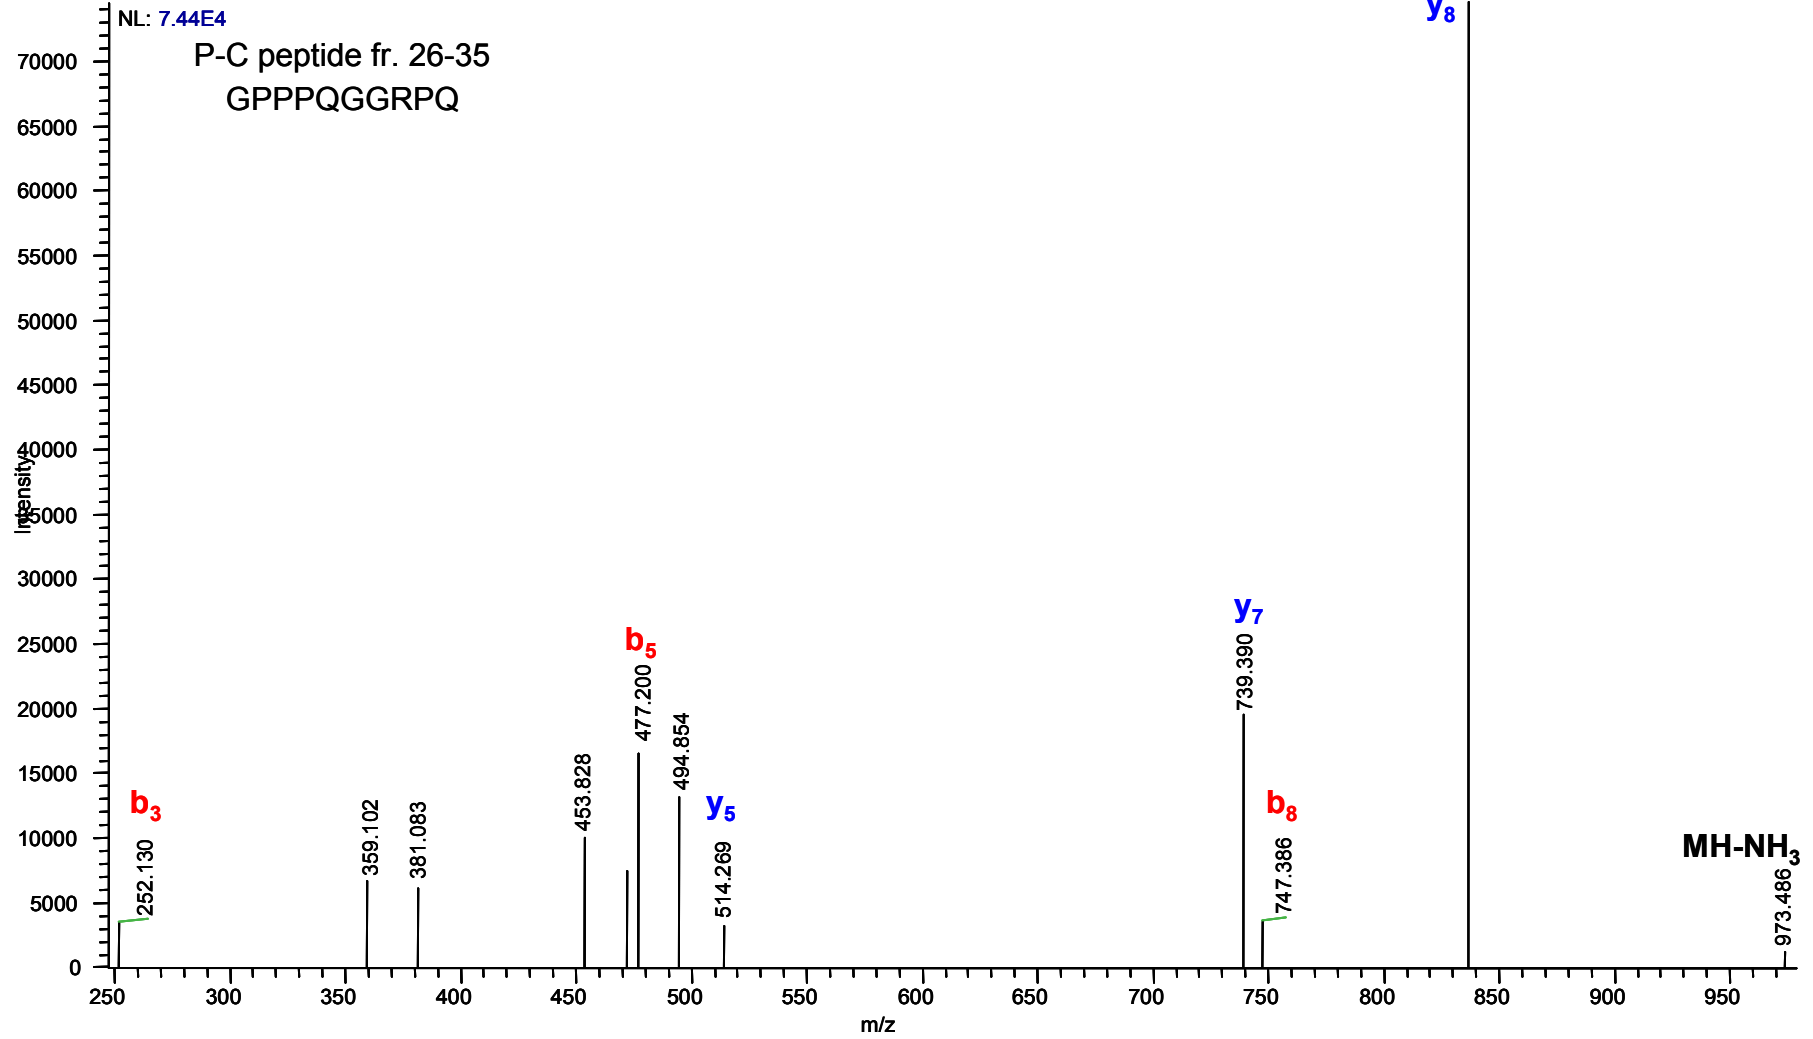

Supplement: supp_M110.001057_mcp.M110.001057-5.pdf [file supp_M110.001057_mcp.M110.001057-5.pdf]
