# Supplementary material
Source: PubMed Central journal article supplement (PMC2953908)

MHEGDEGPGHHKPLGEGT(Phospho)P  
S100A9 Fragm. 89-109 phosph.

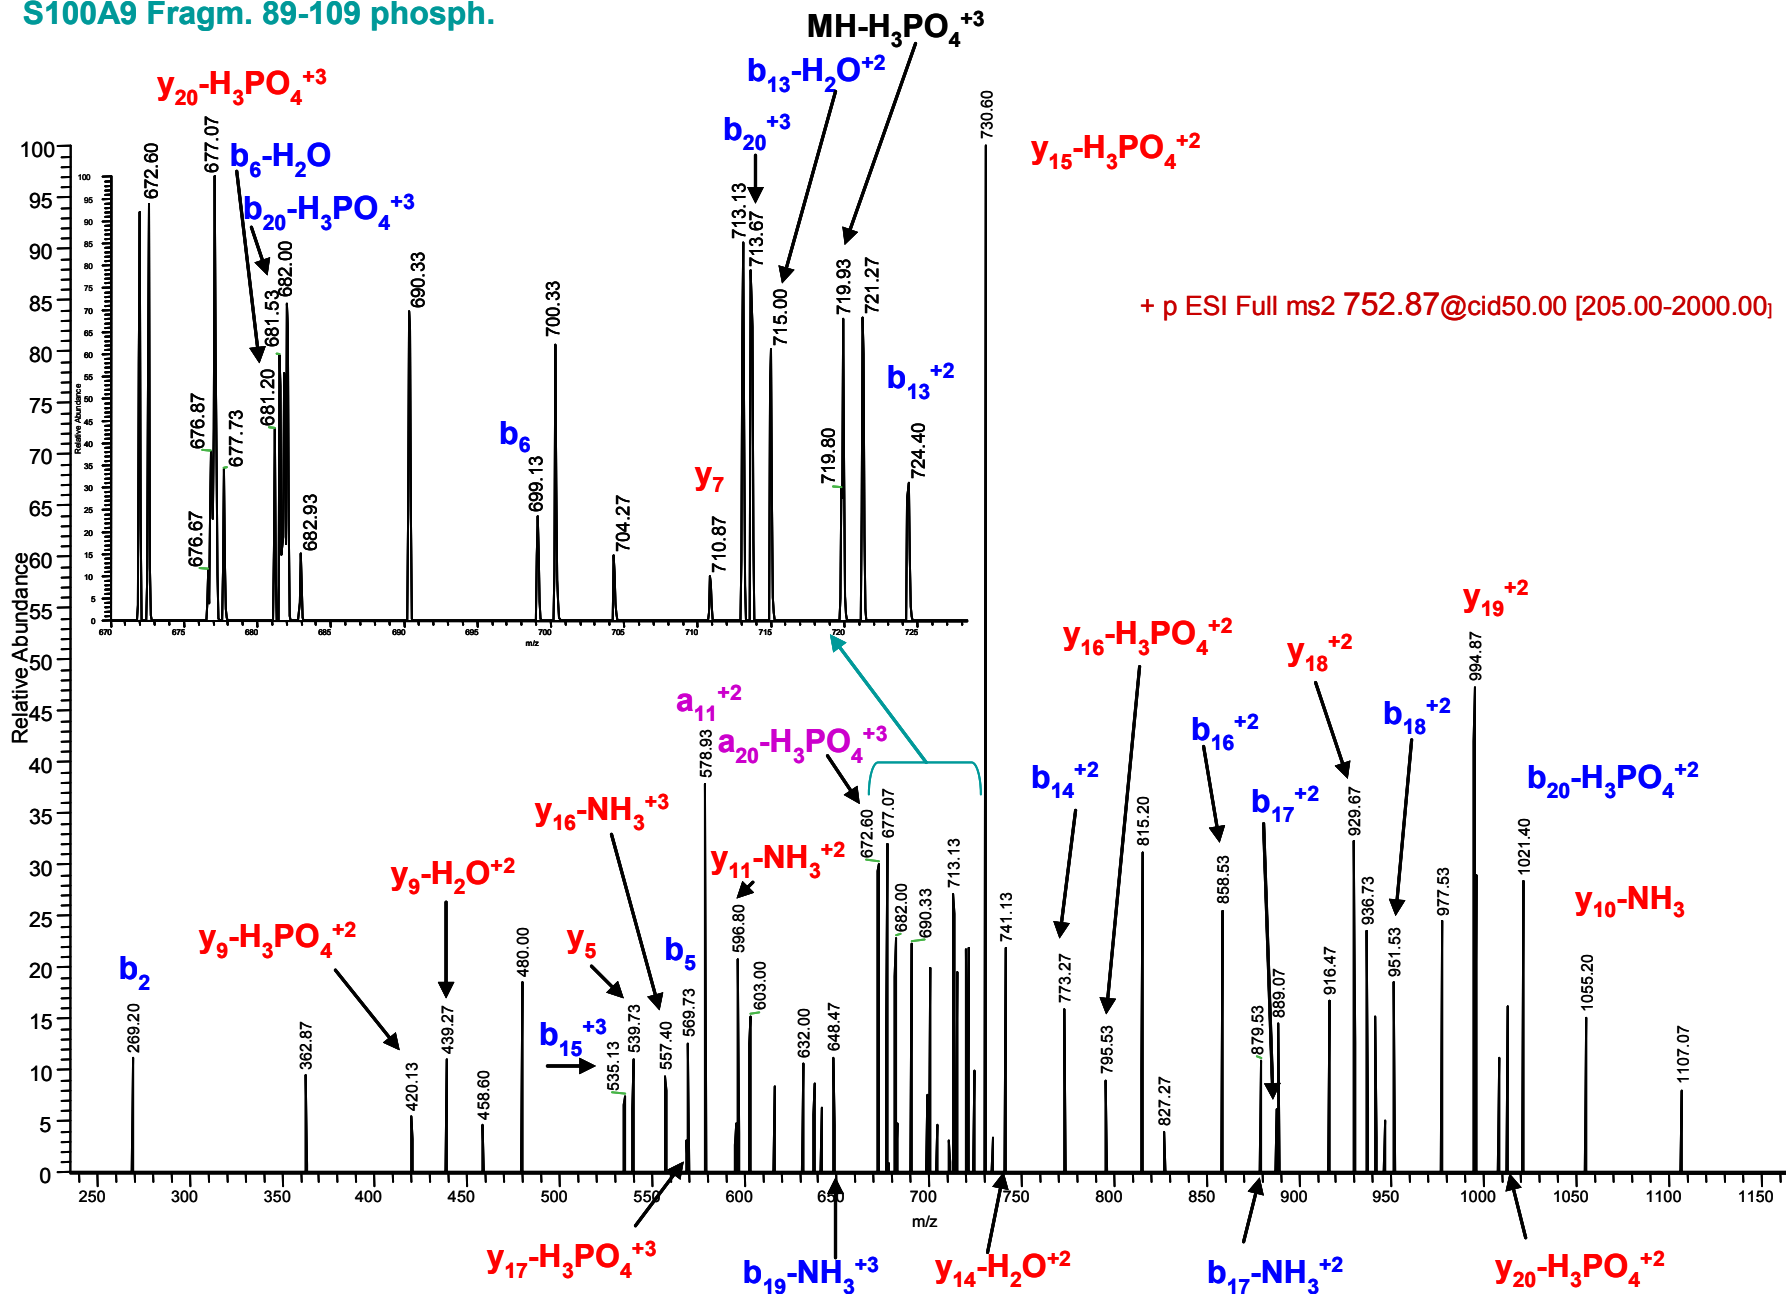

M(Oxidation)HEGDEGPGHHHKPGLGEGTP  
S100A9 Fragm. 89-109 ox

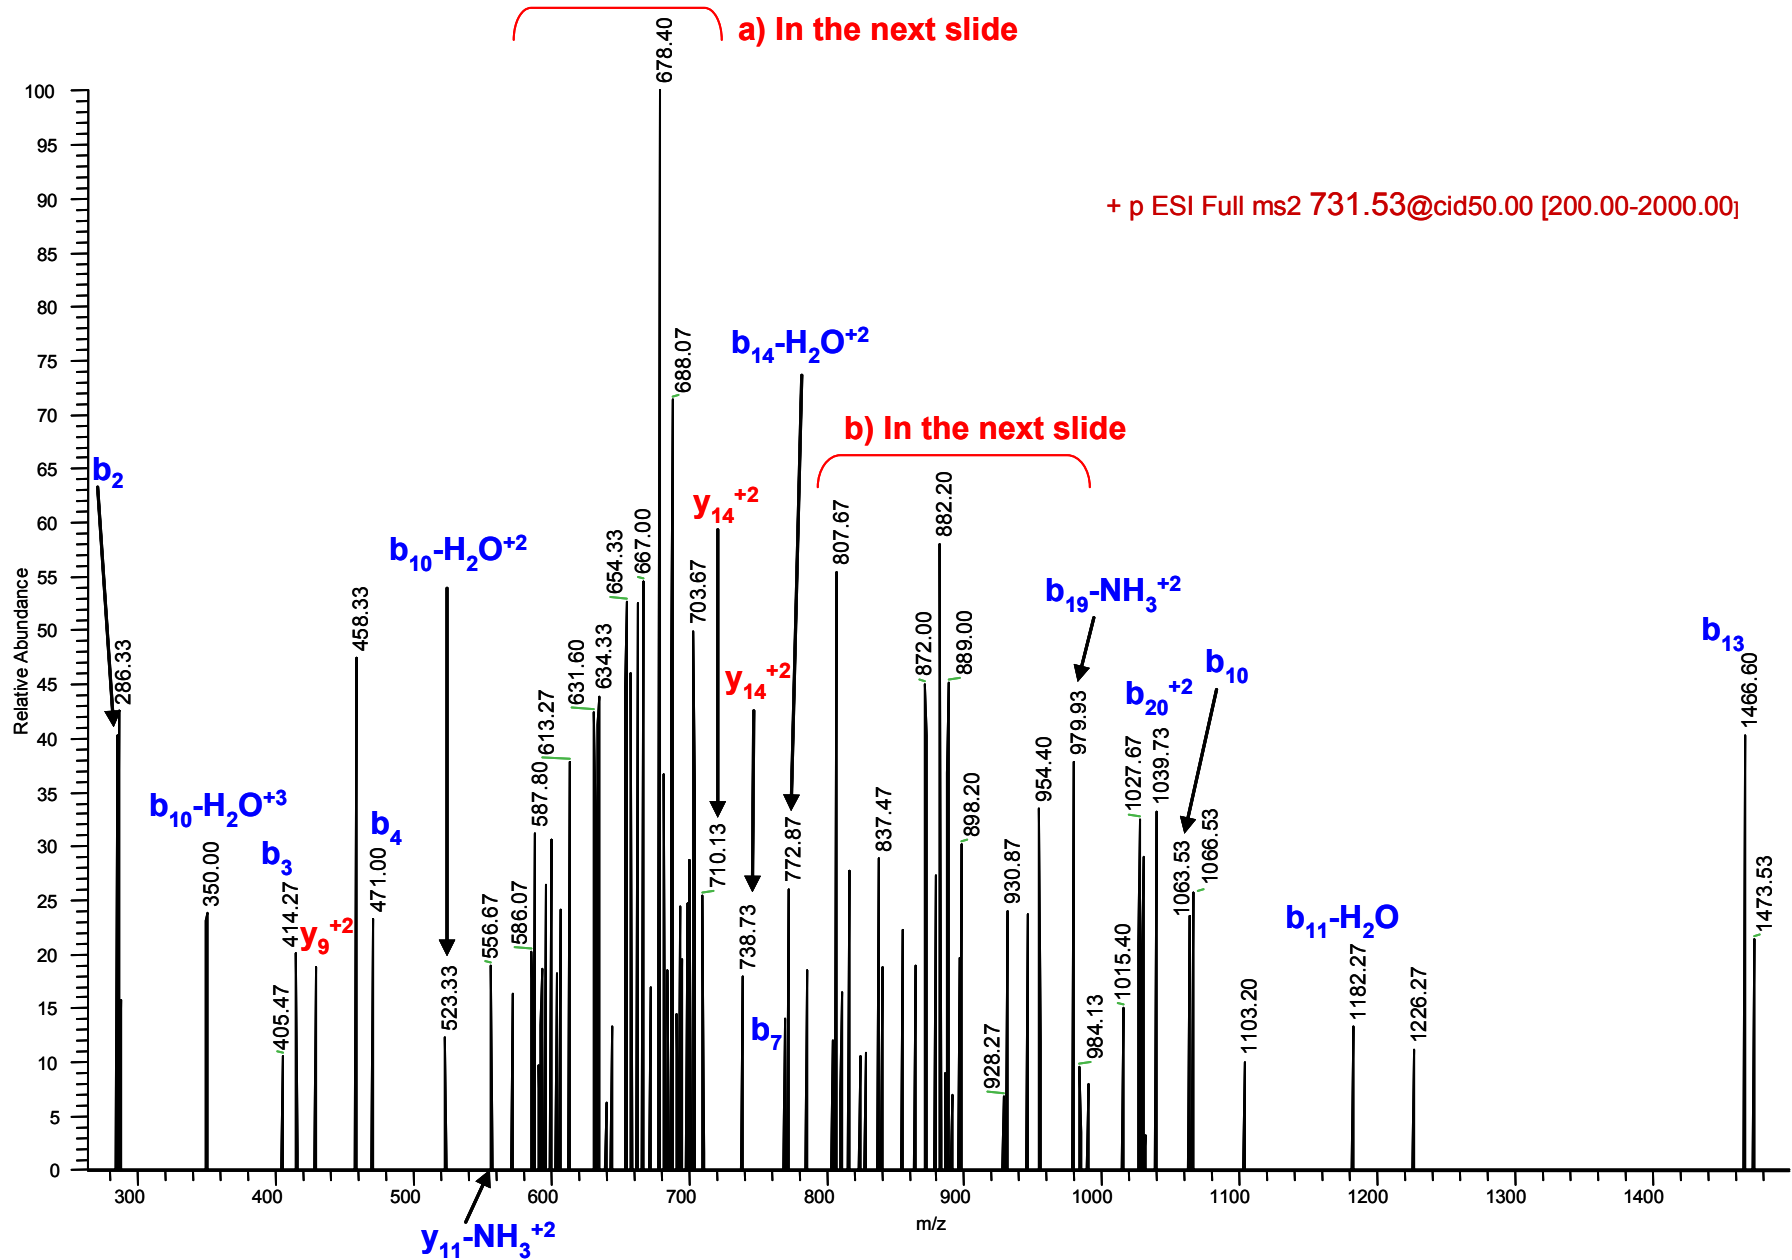

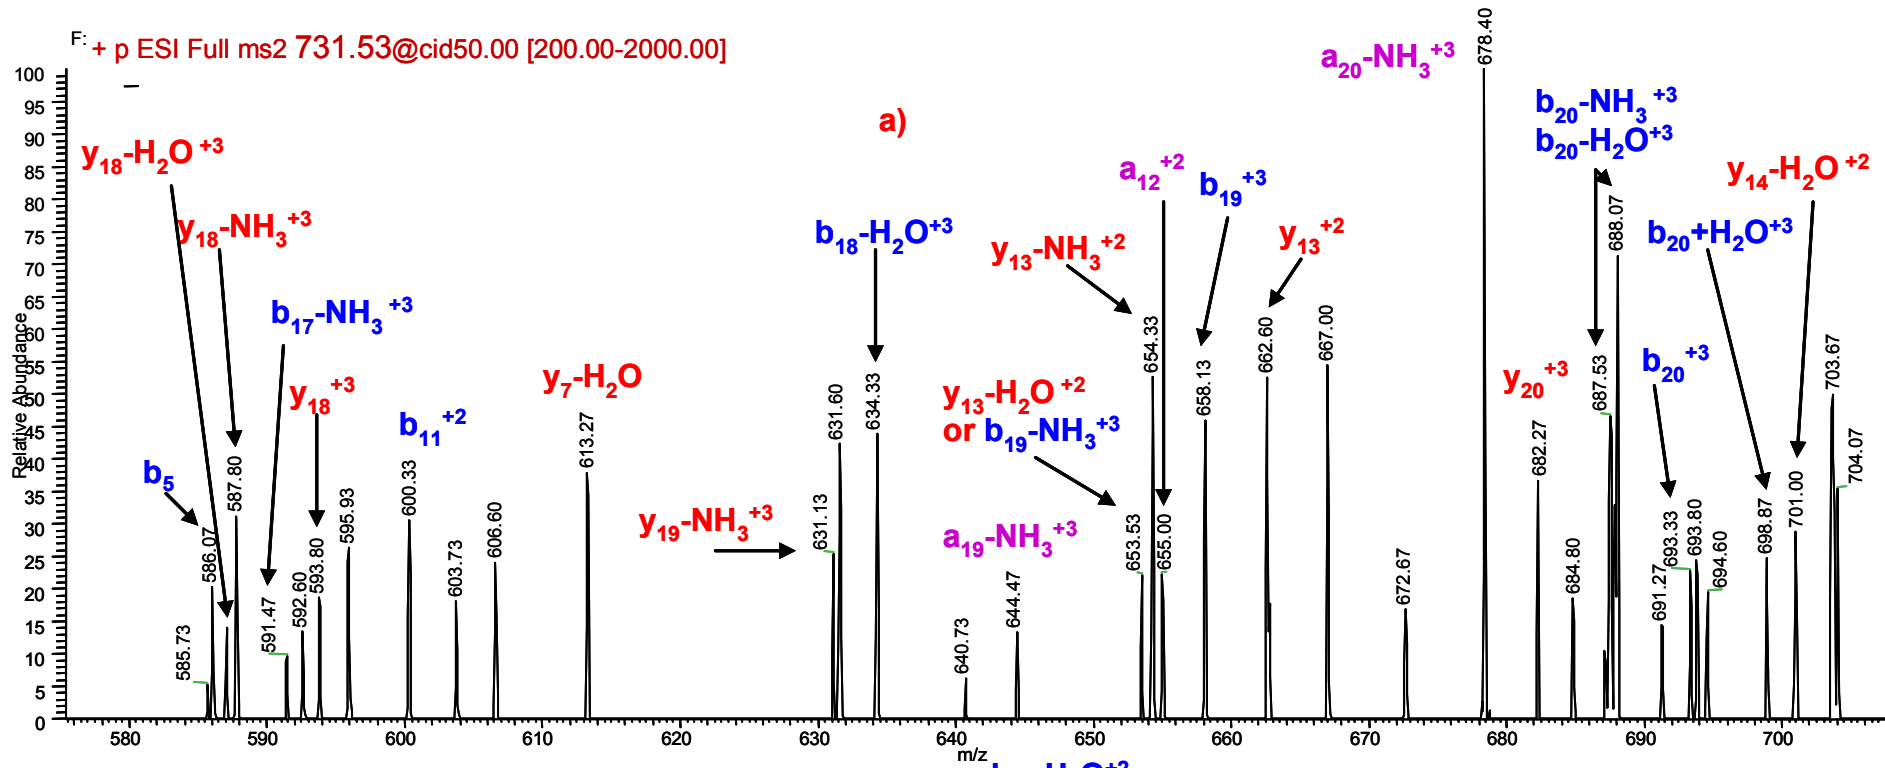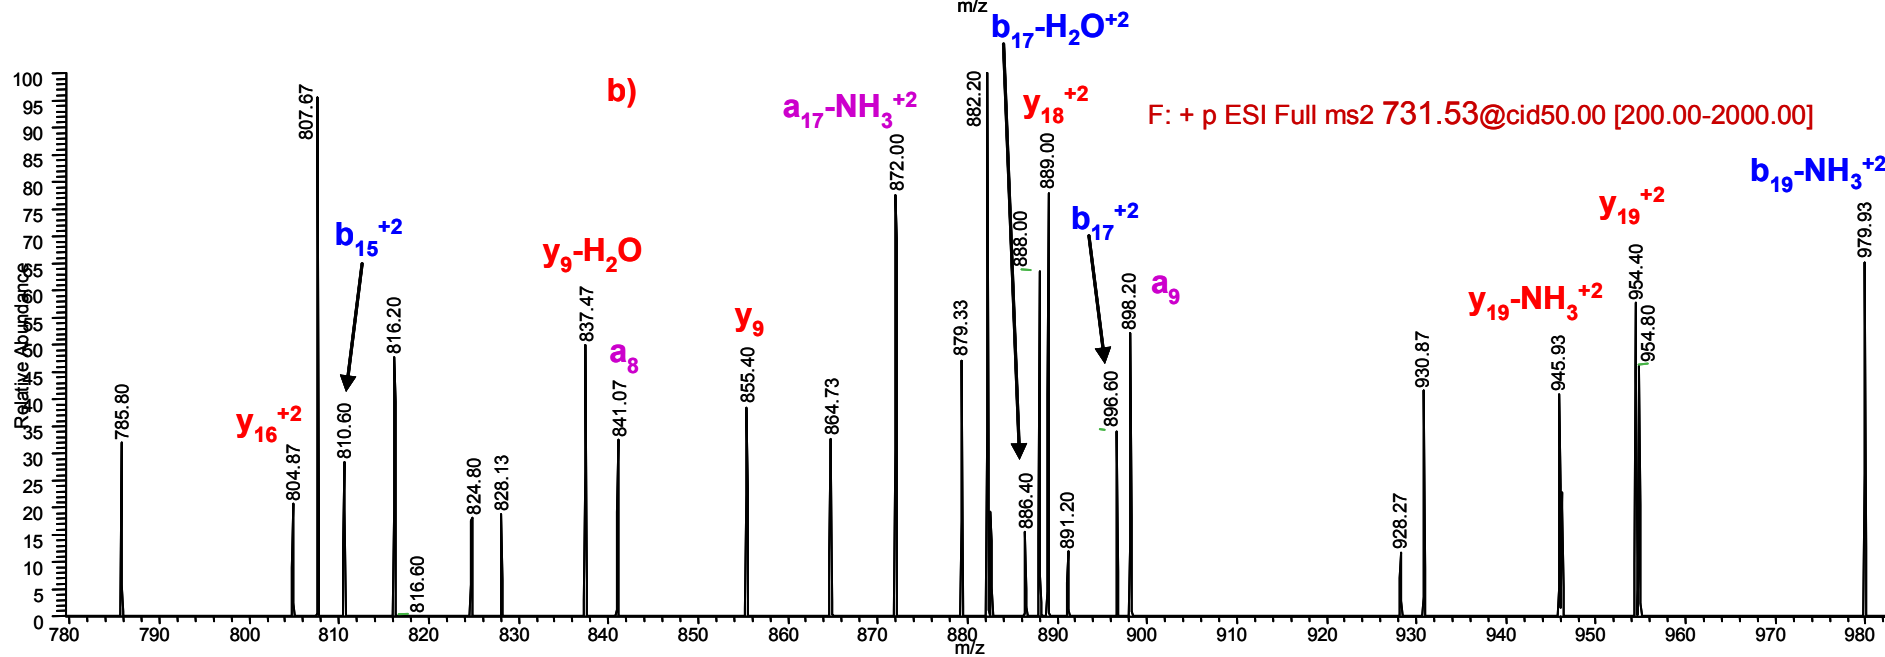

Supplement: supp_M110.001057_mcp.M110.001057-2.pdf [file supp_M110.001057_mcp.M110.001057-2.pdf]

MHEGDEGPGHHKPLGEGTP  
S100A9 Fragm. 89-109

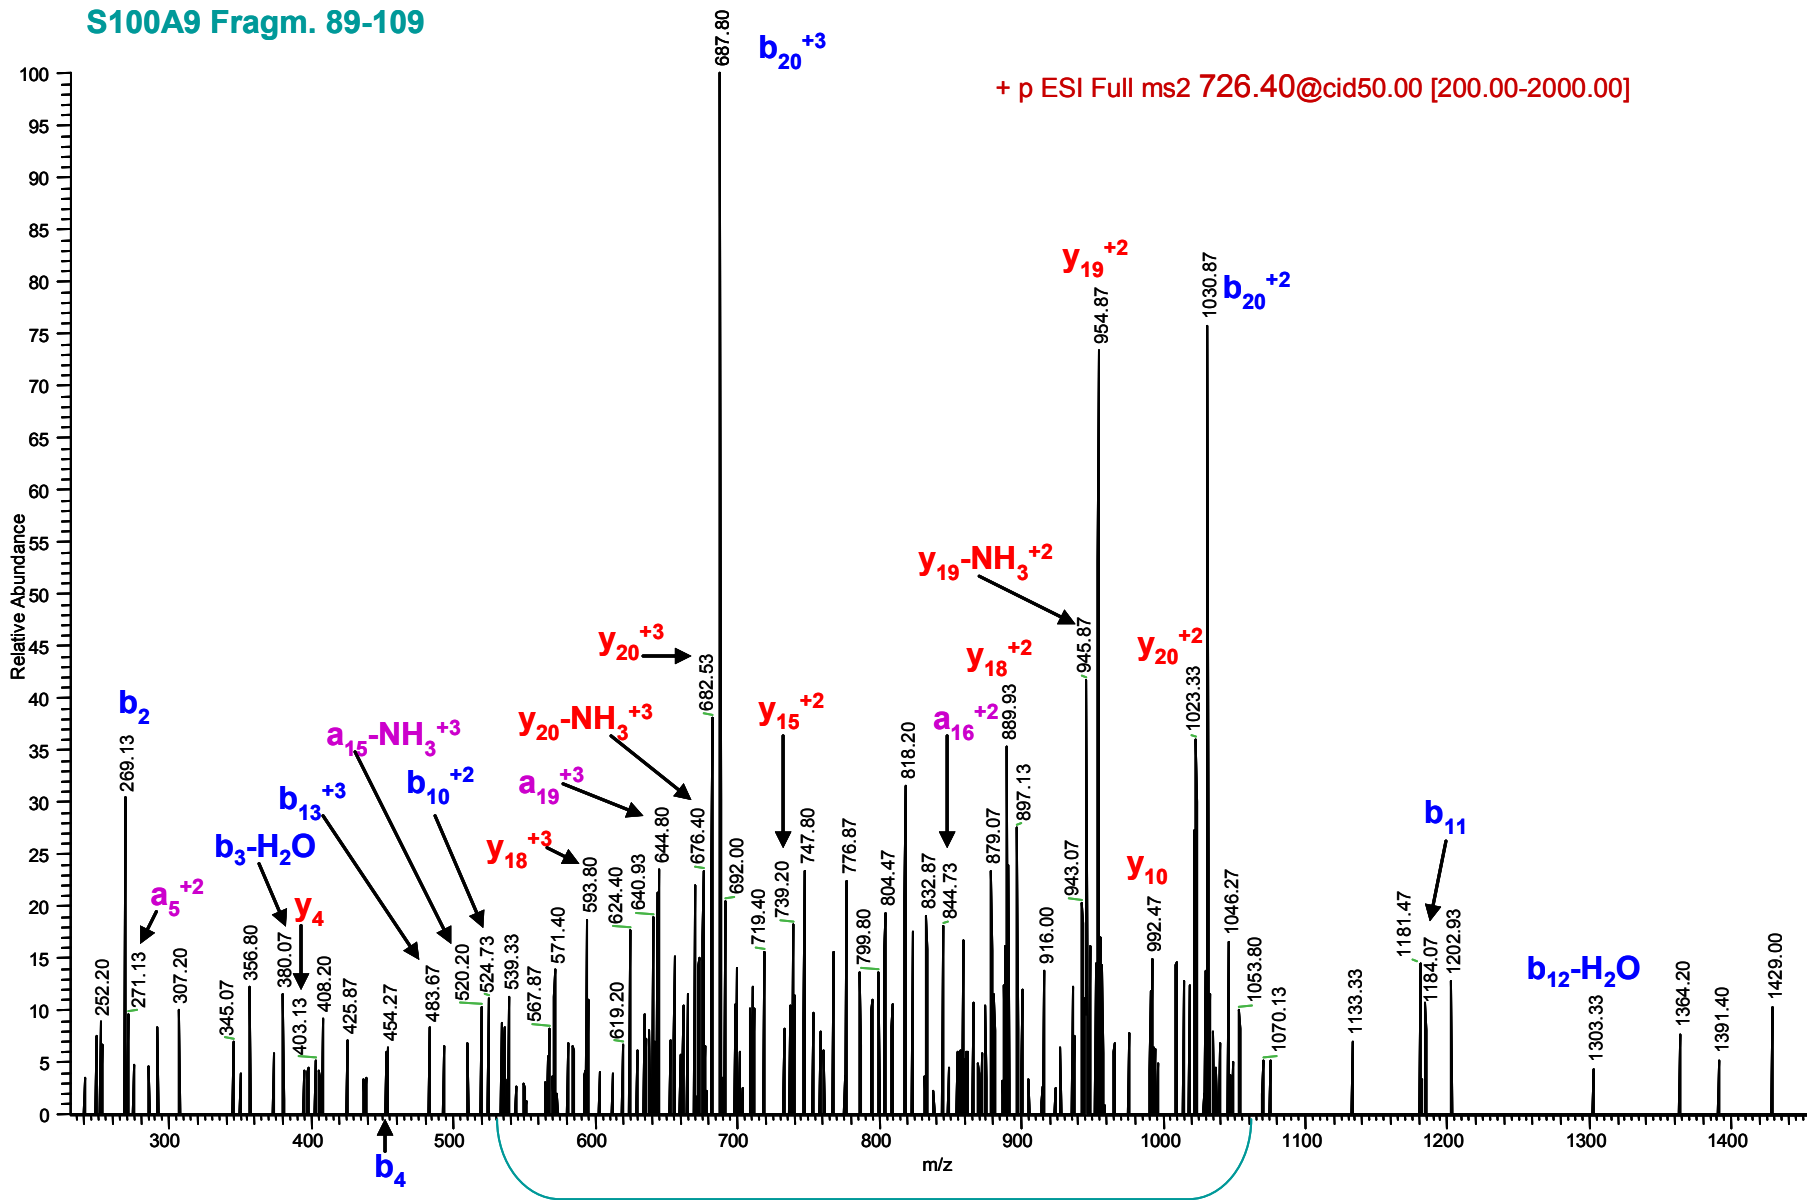

In the next slide

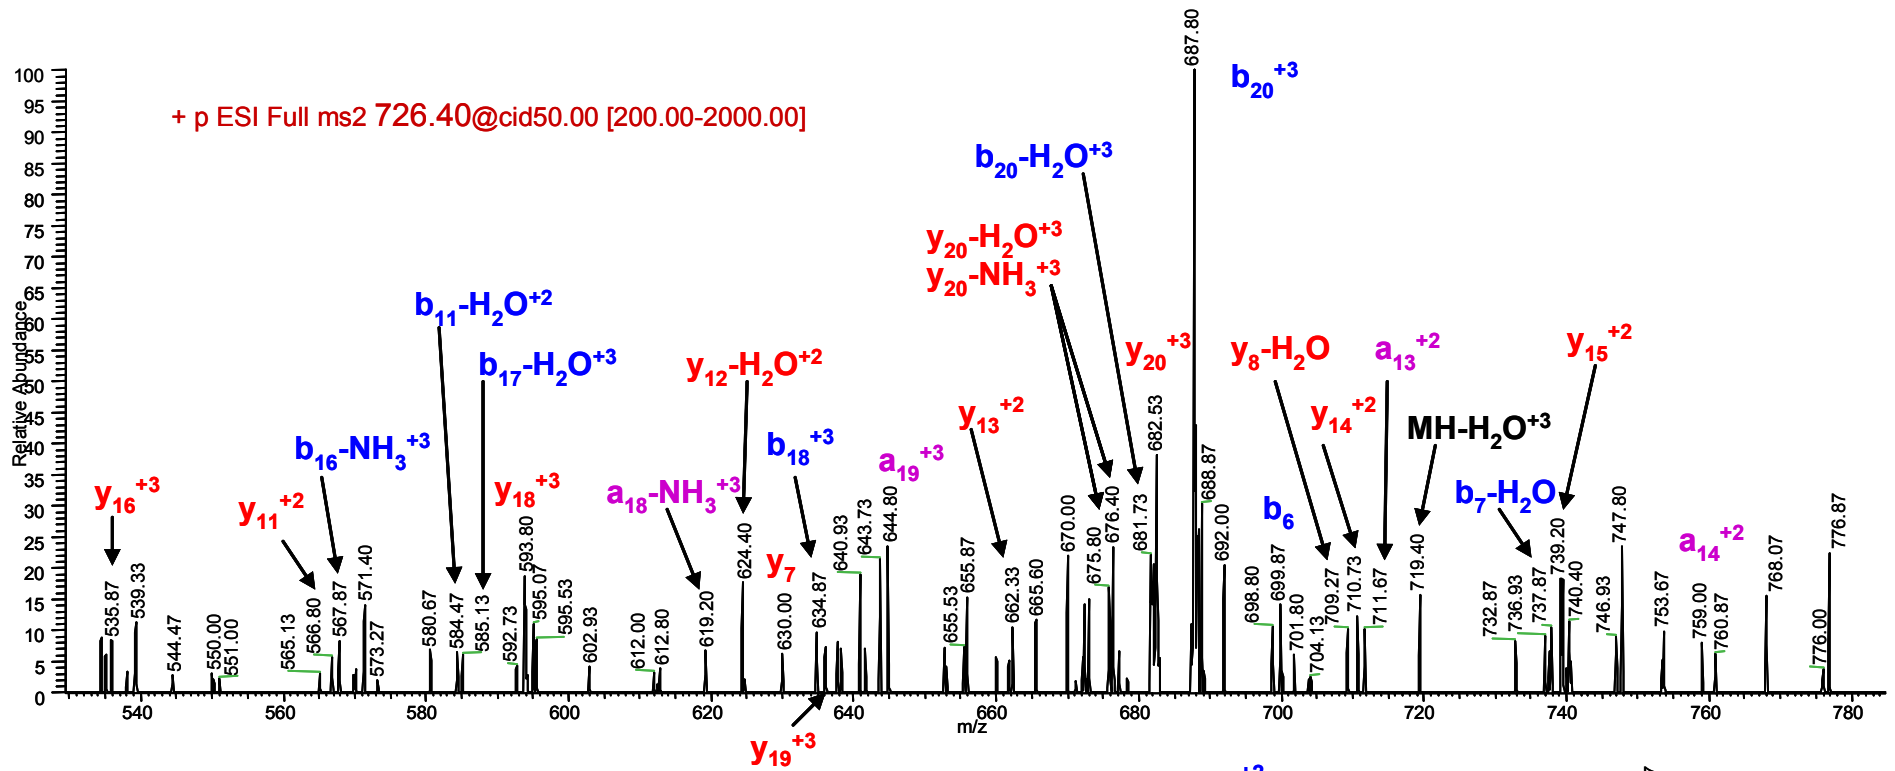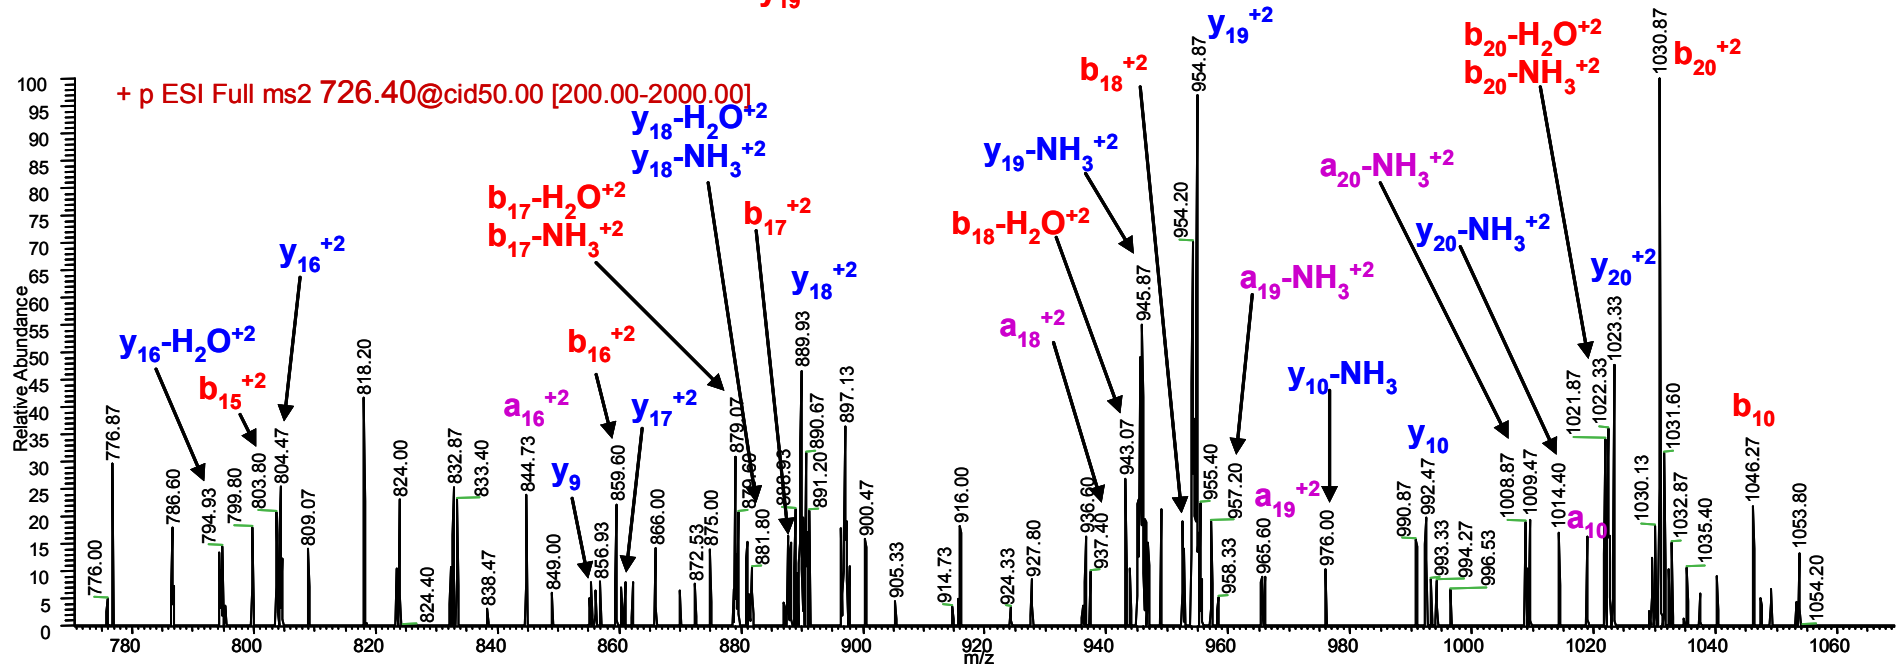

Supplement: supp_M110.001057_mcp.M110.001057-3.pdf [file supp_M110.001057_mcp.M110.001057-3.pdf]

F: FTMS + p NSI sid=15.00 Full ms2 607.30@cid35.00 [165.00-2000.00]  
NL: 1.68E4

PRP-1 fr. 94-110 10.7-11.5  
GPPQQGGHPRPPRGRPQ

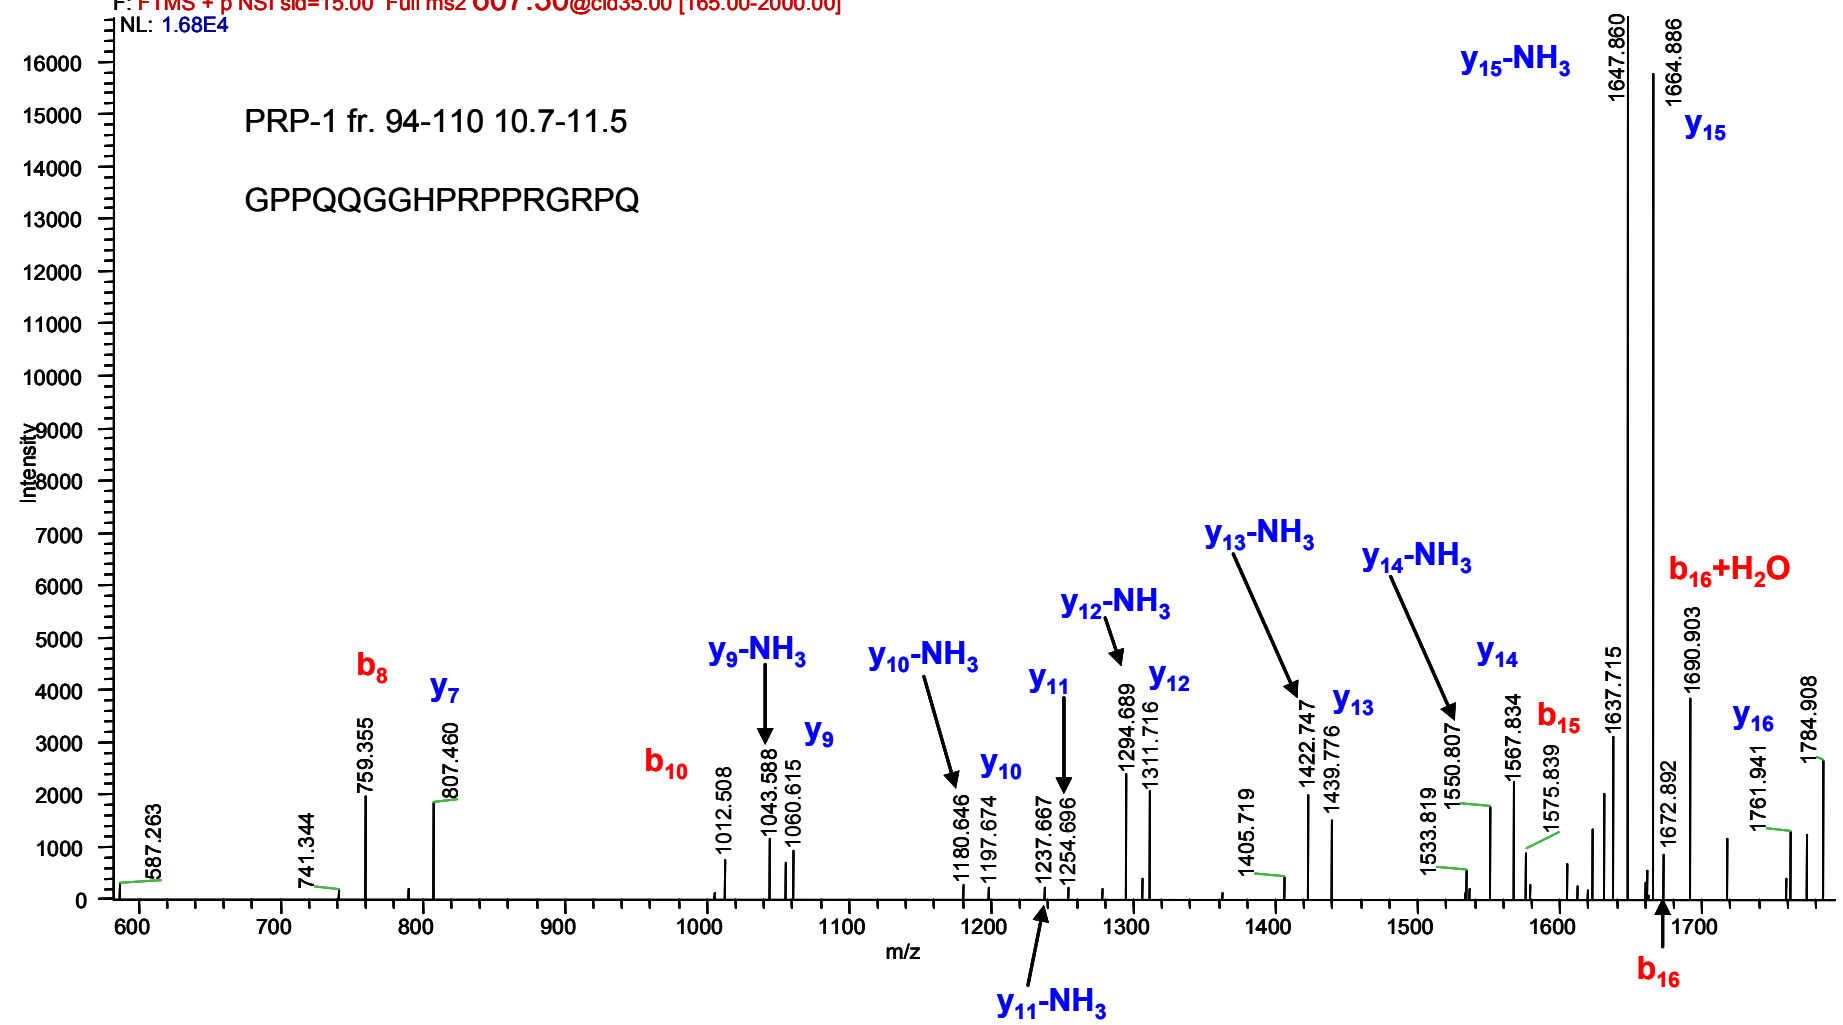

F: FTMS + p NSI sid=15.00 d Full ms2 612.82@cid35.00 [155.00-1240.00]

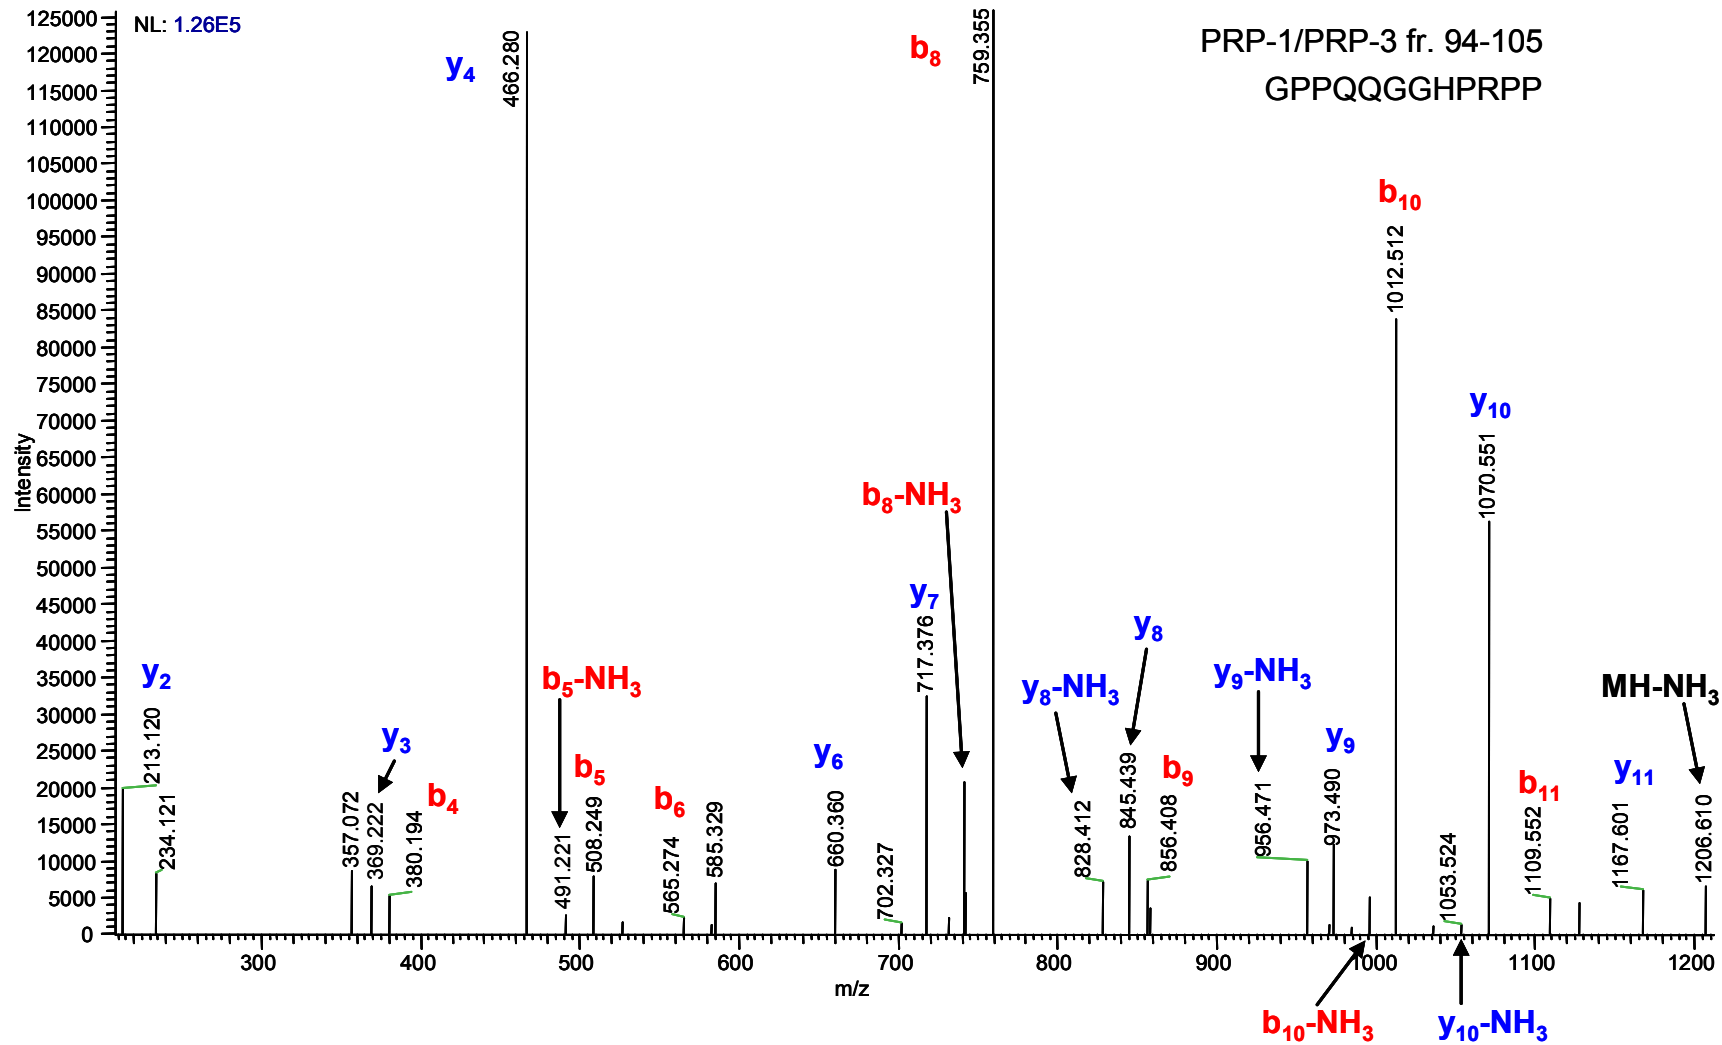

Supplement: supp_M110.001057_mcp.M110.001057-6.pdf [file supp_M110.001057_mcp.M110.001057-6.pdf]
